# Supplementary material for: Genomic Epidemiology and Phylodynamic Analysis of Enterovirus A71 Reveal Its Transmission Dynamics in Asia
Source: PubMed Central journal article supplement (PMC9603238; doi:10.1128/spectrum.01958-22), 2022-10-06
Supplement: spectrum.01958-22-s0001.pdf [file spectrum.01958-22-s0001.pdf]

**Genomic Epidemiology and Phylodynamic Analysis of EV-A71  
Reveal Its Transmission Dynamics in Asia**

Jinbo Xiao<sup>1</sup>, Keqiang Huang<sup>1</sup>, Huanhuan Lu<sup>1</sup>, Yang Song<sup>1</sup>, Zhenzhi Han<sup>1</sup>,  
Man Zhang<sup>2</sup>, Jichen Li<sup>1</sup>, Xiaofang Zhou<sup>3</sup>, Jianhua Chen<sup>4</sup>, Qiuli Yu<sup>5</sup>, Ming  
Yang<sup>6</sup>, Dongmei Yan<sup>1</sup>, Tianjiao Ji<sup>1</sup>, Qian Yang<sup>1</sup>, Shuangli Zhu<sup>1</sup>, Wenbo  
Xu<sup>1,7</sup>, Yong Zhang<sup>1,7\*</sup>

<sup>1</sup>WHO WPRO Regional Polio Reference Laboratory and National Health  
Commission Key Laboratory of biosafety, National Institute for Viral  
Disease Control and Prevention, Chinese Center for Disease Control and  
Prevention, Beijing, People's Republic of China

<sup>2</sup>Shandong Center for Disease Control and Prevention, Jinan, Shandong  
Province, People's Republic of China

<sup>3</sup>Yunnan Center for Disease Control and Prevention, Kunming, Yunnan  
Province, People's Republic of China

<sup>4</sup>Gansu Center for Disease Control and Prevention, Lanzhou, Gansu  
Province, People's Republic of China

<sup>5</sup>Hebei Center for Disease Control and Prevention, Shijiazhuang, Hebei  
Province, People's Republic of China,

<sup>6</sup>Heilongjiang Center for Disease Control and Prevention, Harbin,  
Heilongjiang Province, People's Republic of China,

<sup>7</sup>Center for Biosafety Mega-Science, Chinese Academy of Sciences,  
Wuhan, Hubei Province, People's Republic of China

Supplementary Table S1. Geographic and temporal information of the 200 newly sequenced sequences.

| Regions         | Provinces    | Numbers of sequences |      |      |      | Total |
|-----------------|--------------|----------------------|------|------|------|-------|
|                 |              | 2016                 | 2017 | 2018 | 2019 |       |
| North China     | Shanxi       |                      | 4    | 3    |      | 7     |
|                 | Hebei        | 4                    | 9    | 4    | 1    | 18    |
|                 | Beijing      |                      | 2    | 5    |      | 7     |
|                 | Tianjin      | 5                    | 1    | 3    |      | 9     |
| Northeast China | Liaoning     |                      | 3    |      |      | 3     |
|                 | Heilongjiang | 4                    | 2    | 5    |      | 11    |
|                 | Jilin        |                      |      | 5    |      | 5     |
| Northwest China | Xinjiang     | 4                    |      | 2    |      | 6     |
|                 | Qinghai      |                      | 2    |      |      | 2     |
|                 | Gansu        | 3                    | 6    | 7    | 3    | 19    |
|                 | Ningxia      |                      | 3    | 5    |      | 8     |
|                 | Shaanxi      |                      | 2    |      |      | 2     |
| Southwest China | Sichuan      | 4                    |      |      |      | 4     |
|                 | Yunnan       | 32                   | 5    | 3    | 3    | 43    |
|                 | Chongqing    | 4                    | 2    |      |      | 6     |
| East China      | Shandong     | 5                    | 2    |      | 1    | 8     |
|                 | Anhui        | 1                    | 3    |      |      | 4     |
|                 | Jiangxi      | 5                    | 2    | 1    |      | 8     |
|                 | Zhejiang     | 3                    | 2    |      |      | 5     |
| South China     | Guangxi      |                      | 1    |      |      | 1     |
|                 | Guangdong    |                      | 2    | 4    |      | 6     |
|                 | Hainan       |                      | 3    | 4    |      | 7     |
| Central China   | Henan        |                      | 3    | 3    |      | 6     |
|                 | Hunan        | 5                    |      |      |      | 5     |
| Total           |              | 79                   | 59   | 54   | 8    | 200   |

Supplementary Table S2. Primers used in this study for full-sequence amplification of EV-A71.

| Primer name  | Nucleotide position | Sequence (5'-3')                                | Orientation | Reference  |
|--------------|---------------------|-------------------------------------------------|-------------|------------|
| 0001S48      |                     | GGGGACAAGTTTGTACAAAAAAGCAGGCTTTAAACAGCTCTGGGGTT | Forward     | (1)        |
| EV-A71-659A  | 659-678             | CAATTGCTCTGTTGCACACC                            | Reverse     | This study |
| EV-A71-1018A | 1018-1037           | GTGATGGTGGAGTTGCCAAT                            | Reverse     | This study |
| EV-A71-863S  | 863-882             | GGGCAAACAGAGTCTCAAGC                            | Forward     | This study |
| EV-A71-1948A | 1948-1967           | GCGCAGTCTCTCCATTAAGC                            | Reverse     | This study |
| EV-A71-1767S | 1767-1786           | GTTTCGGCACCTATTCTACC                            | Forward     | This study |
| EV-A71-2578A | 2578-2597           | TGGAGTGCTGGAACCTTACC                            | Reverse     | This study |
| EV-A71-2472S | 2472-2491           | ATAGGAGACAGCGTGAGTAG                            | Forward     | This study |
| EV-A71-3423A | 3423-3442           | CGAGAACTGTCTTCCCAAAC                            | Reverse     | This study |
| EV-A71-3342S | 3342-3361           | CAGTCTGGGGCCATTTATGT                            | Forward     | This study |
| EV-A71-4345A | 4345-4364           | TGGAACCTGCGACAGAAGTG                            | Reverse     | This study |
| EV-A71-4181S | 4181-4200           | AGTACCAGCAGCCAAGGAGA                            | Forward     | This study |
| EV-A71-5207A | 5207-5226           | GGTGGGAGTTTCAGGAATGA                            | Reverse     | This study |
| EV-A71-5068S | 5068-5087           | CACAATCGAGGCTCTTTTCC                            | Forward     | This study |
| EV-A71-6195A | 6195-6215           | GCTGCCTCTTTGATGTACTCG                           | Reverse     | This study |
| EV-A71-5897S | 5897-5916           | CGCAGGCCTTAAAAGGAGTT                            | Forward     | This study |
| EV-A71-6749A | 6749-6768           | TGTGTGGTTGATCCCTCAA                             | Reverse     | This study |
| EV-A71-6602S | 6602-6621           | TTTGCTCCCTGGTTCCTCT                             | Forward     | This study |
| 7500A        |                     | GGGGACCACTTTGTACAAGAAAGCTGGG(T) <sub>24</sub>   | Reverse     | (1)        |

Supplementary Table S3. Information on 259 global EV-A71 for phylogenetic analysis.

|          | Isolated year | Country | Source     | Genotype/subgenotype | Evolutionary lineage |
|----------|---------------|---------|------------|----------------------|----------------------|
| ZJ/10    | 2016          | China   | This study | C4                   | I                    |
| ZJ/110   | 2017          | China   | This study | C4                   | I                    |
| BJ/13    | 2018          | China   | This study | C4                   | I                    |
| XJ/13    | 2018          | China   | This study | C4                   | I                    |
| TJ/1321Y | 2016          | China   | This study | C4                   | I                    |
| SX/164   | 2017          | China   | This study | C4                   | I                    |
| GS/165   | 2018          | China   | This study | C4                   | I                    |
| BJ/17    | 2017          | China   | This study | C4                   | I                    |
| HB/181   | 2017          | China   | This study | C4                   | I                    |
| BJ/19    | 2018          | China   | This study | C4                   | I                    |
| HaN/19   | 2017          | China   | This study | C4                   | I                    |
| HLJ/19   | 2017          | China   | This study | C4                   | I                    |
| BJ/22    | 2017          | China   | This study | C4                   | I                    |
| GD/22    | 2018          | China   | This study | C4                   | I                    |
| SD/238   | 2017          | China   | This study | C4                   | I                    |
| HaN/24   | 2018          | China   | This study | C4                   | I                    |
| HeN/250  | 2018          | China   | This study | C4                   | I                    |
| JX/26    | 2018          | China   | This study | C4                   | I                    |
| LN/26-67 | 2017          | China   | This study | C4                   | I                    |
| HB/269   | 2018          | China   | This study | C4                   | I                    |
| HeN/276  | 2017          | China   | This study | C4                   | I                    |
| HeN/287  | 2017          | China   | This study | C4                   | I                    |
| XJ/3     | 2018          | China   | This study | C4                   | I                    |
| HeN/313  | 2017          | China   | This study | C4                   | I                    |
| GS/373   | 2017          | China   | This study | C4                   | I                    |
| HuN/39   | 2016          | China   | This study | C4                   | I                    |
| JX/39    | 2017          | China   | This study | C4                   | I                    |
| CQ/4     | 2017          | China   | This study | C4                   | I                    |
| AH/50    | 2017          | China   | This study | C4                   | I                    |
| SC/50    | 2016          | China   | This study | C4                   | I                    |
| GS/520   | 2017          | China   | This study | C4                   | I                    |
| TJ/53    | 2017          | China   | This study | C4                   | I                    |
| GD/58    | 2018          | China   | This study | C4                   | I                    |
| JX/59    | 2016          | China   | This study | C4                   | I                    |
| HaN/6    | 2017          | China   | This study | C4                   | I                    |
| QH/63    | 2017          | China   | This study | C4                   | I                    |
| AH/65    | 2017          | China   | This study | C4                   | I                    |
| HLJ/66   | 2018          | China   | This study | C4                   | I                    |
| CQ/68    | 2016          | China   | This study | C4                   | I                    |
| SX/69    | 2018          | China   | This study | C4                   | I                    |
| HLJ/71   | 2018          | China   | This study | C4                   | I                    |
| GD/8     | 2017          | China   | This study | C4                   | I                    |

|           |      |            |            |    |   |
|-----------|------|------------|------------|----|---|
| JL/83     | 2018 | China      | This study | C4 | I |
| XJ/83     | 2016 | China      | This study | C4 | I |
| SX/86     | 2017 | China      | This study | C4 | I |
| BJ/9      | 2018 | China      | This study | C4 | I |
| GS/9      | 2016 | China      | This study | C4 | I |
| XJ/93     | 2016 | China      | This study | C4 | I |
| HeN/a5    | 2018 | China      | This study | C4 | I |
| YN/A50    | 2017 | China      | This study | C4 | I |
| YN/A80    | 2018 | China      | This study | C4 | I |
| AB575911  | 1966 | Nederlands | Genbank    | B0 | B |
| AB575912  | 1966 | Nederlands | Genbank    | B0 | B |
| AB575935  | 1991 | Nederlands | Genbank    | C1 | E |
| AB575937  | 2001 | Nederlands | Genbank    | C1 | E |
| AB575942  | 2007 | Nederlands | Genbank    | C2 | E |
| AF136379  | 1998 | China      | Genbank    | C2 | E |
| AF304457  | 1998 | China      | Genbank    | C2 | E |
| AM396585  | 1997 | Malaysia   | Genbank    | C2 | E |
| AM396586  | 1997 | Malaysia   | Genbank    | B3 | F |
| YN/B89    | 2017 | China      | This study | C4 | I |
| YN/C76    | 2018 | China      | This study | C4 | I |
| YN/C99    | 2018 | China      | This study | C4 | I |
| YN/D28    | 2016 | China      | This study | C4 | I |
| DQ341354  | 1998 | Singapore  | Genbank    | B3 | F |
| DQ341355  | 2000 | Korea      | Genbank    | C3 | G |
| DQ341356  | 2000 | Korea      | Genbank    | C3 | G |
| DQ341357  | 1999 | Australia  | Genbank    | C2 | E |
| DQ341358  | 2000 | Malaysia   | Genbank    | C1 | E |
| DQ341359  | 1998 | Malaysia   | Genbank    | C1 | E |
| DQ341361  | 2000 | Australia  | Genbank    | C1 | E |
| DQ341363  | 2003 | Malaysia   | Genbank    | B5 | H |
| DQ341365  | 2001 | Malaysia   | Genbank    | B4 | H |
| DQ341368  | 1997 | Malaysia   | Genbank    | B3 | F |
| DQ381846  | 1999 | Australia  | Genbank    | C2 | E |
| EF063152  | 2006 | China      | Genbank    | C5 | L |
| TJ/ET0520 | 2016 | China      | Genbank    | C4 | I |
| EU364841  | 1999 | Australia  | Genbank    | B3 | F |
| EU527983  | 2007 | China      | Genbank    | C5 | L |
| EU703812  | 2008 | China      | Genbank    | C4 | I |
| EU703813  | 2008 | China      | Genbank    | C4 | I |
| YN/F257   | 2016 | China      | This study | C4 | I |
| HuN/F55   | 2016 | China      | This study | C4 | I |
| HuN/FC47  | 2016 | China      | This study | C4 | I |
| FJ172159  | 2008 | Singapore  | Genbank    | C2 | E |
| FJ194965  | 2008 | China      | Genbank    | C4 | I |

|          |      |           |            |    |   |
|----------|------|-----------|------------|----|---|
| FJ357373 | 2004 | China     | Genbank    | C4 | I |
| FJ357376 | 2001 | China     | Genbank    | B4 | H |
| FJ357378 | 2003 | China     | Genbank    | B5 | H |
| FJ357380 | 1986 | China     | Genbank    | B1 | C |
| FJ357381 | 1986 | China     | Genbank    | B1 | C |
| FJ360545 | 2008 | China     | Genbank    | C4 | I |
| FJ461781 | 2008 | Singapore | Genbank    | B5 | H |
| FJ606450 | 2008 | China     | Genbank    | C4 | N |
| FJ713137 | 2009 | China     | Genbank    | C4 | I |
| GQ231929 | 2004 | China     | Genbank    | C4 | I |
| GQ231935 | 2008 | China     | Genbank    | B5 | H |
| GQ231936 | 2008 | China     | Genbank    | B5 | H |
| GU459071 | 2008 | China     | Genbank    | C4 | I |
| NX/GY038 | 2017 | China     | This study | C4 | I |
| NY/GY096 | 2017 | China     | This study | C4 | I |
| HM156065 | 2009 | China     | Genbank    | B5 | H |
| HM245927 | 2010 | China     | Genbank    | C4 | I |
| HM622390 | 2009 | China     | Genbank    | B5 | H |
| HM622391 | 2008 | China     | Genbank    | C2 | M |
| HM622392 | 2008 | China     | Genbank    | C2 | M |
| HQ426649 | 2010 | China     | Genbank    | C4 | I |
| HQ647167 | 2007 | Canada    | Genbank    | C2 | E |
| HQ647177 | 2007 | Canada    | Genbank    | C2 | E |
| HQ647179 | 2006 | Canada    | Genbank    | C4 | I |
| HQ694984 | 2008 | China     | Genbank    | C4 | I |
| HQ694985 | 2008 | China     | Genbank    | C4 | I |
| HQ825317 | 2008 | China     | Genbank    | C4 | I |
| HQ891923 | 2009 | China     | Genbank    | C4 | I |
| YN/I12   | 2019 | China     | This study | C4 | I |
| YN/I13   | 2016 | China     | This study | C4 | I |
| YN/J48   | 2017 | China     | This study | C4 | I |
| JF738000 | 2009 | Thailand  | Genbank    | C1 | E |
| JF820312 | 2010 | China     | Genbank    | C4 | I |
| JF830007 | 2010 | China     | Genbank    | C4 | I |
| JN052925 | 2011 | China     | Genbank    | C4 | I |
| JN864019 | 2010 | China     | Genbank    | C4 | I |
| JQ280307 | 2008 | China     | Genbank    | C2 | M |
| JQ319054 | 2009 | China     | Genbank    | C4 | I |
| JQ639384 | 2011 | China     | Genbank    | C4 | I |
| JQ681218 | 2008 | China     | Genbank    | C4 | I |
| JQ742002 | 2001 | China     | Genbank    | C4 | I |
| JX244182 | 2009 | China     | Genbank    | C4 | I |
| JX244184 | 2009 | China     | Genbank    | C4 | I |
| JX244187 | 2010 | China     | Genbank    | C4 | I |

|          |      |          |            |    |   |
|----------|------|----------|------------|----|---|
| HLJ/JX80 | 2016 | China    | This study | C4 | I |
| KC296443 | 2011 | Vietnam  | Genbank    | C4 | I |
| KC296444 | 2011 | Vietnam  | Genbank    | C5 | L |
| KC296445 | 2011 | Vietnam  | Genbank    | C4 | I |
| KC414134 | 2011 | China    | Genbank    | C4 | O |
| KF142412 | 2013 | China    | Genbank    | C4 | I |
| KF142413 | 2013 | China    | Genbank    | C4 | I |
| KF543271 | 2012 | Cambodia | Genbank    | C4 | I |
| KF974782 | 2008 | China    | Genbank    | B5 | H |
| KF974793 | 2012 | China    | Genbank    | B5 | H |
| KF974794 | 2012 | China    | Genbank    | B5 | H |
| KF974796 | 2012 | China    | Genbank    | B5 | H |
| KJ186973 | 2010 | China    | Genbank    | C4 | I |
| KJ400360 | 2013 | Russia   | Genbank    | C4 | I |
| KJ686131 | 2012 | Vietnam  | Genbank    | B5 | H |
| KJ686137 | 2012 | Vietnam  | Genbank    | B5 | H |
| KJ686144 | 2012 | Vietnam  | Genbank    | C5 | L |
| KJ686155 | 2012 | Vietnam  | Genbank    | C4 | I |
| KJ686165 | 2011 | Vietnam  | Genbank    | C4 | I |
| KJ686176 | 2012 | Vietnam  | Genbank    | B5 | H |
| KJ686178 | 2011 | Vietnam  | Genbank    | C5 | L |
| KJ686179 | 2011 | Vietnam  | Genbank    | C5 | L |
| KJ686190 | 2011 | Vietnam  | Genbank    | C4 | I |
| KJ686200 | 2011 | Vietnam  | Genbank    | C4 | I |
| KJ686220 | 2012 | Vietnam  | Genbank    | C4 | I |
| KJ686230 | 2011 | Vietnam  | Genbank    | C5 | L |
| KJ686239 | 2011 | Vietnam  | Genbank    | C4 | I |
| KJ686240 | 2012 | Vietnam  | Genbank    | C4 | I |
| KJ686252 | 2012 | Vietnam  | Genbank    | C4 | I |
| KJ686254 | 2012 | Vietnam  | Genbank    | C4 | I |
| KJ686255 | 2011 | Vietnam  | Genbank    | C4 | I |
| KJ686259 | 2012 | Vietnam  | Genbank    | C4 | I |
| KJ686274 | 2012 | Vietnam  | Genbank    | C4 | I |
| KJ686285 | 2012 | Vietnam  | Genbank    | C4 | I |
| KJ686290 | 2011 | Vietnam  | Genbank    | C4 | I |
| KJ686293 | 2012 | Vietnam  | Genbank    | C4 | I |
| KJ686303 | 2011 | Vietnam  | Genbank    | C4 | I |
| KJ686306 | 2012 | Vietnam  | Genbank    | C4 | I |
| KJ784495 | 2011 | China    | Genbank    | C4 | O |
| KJ784496 | 2012 | China    | Genbank    | C4 | I |
| KM055005 | 2011 | Laos     | Genbank    | C4 | I |
| KP198624 | 2012 | China    | Genbank    | C4 | I |
| KP274875 | 2011 | China    | Genbank    | C4 | I |
| KP274877 | 2011 | China    | Genbank    | B4 | H |

|          |      |               |         |    |   |
|----------|------|---------------|---------|----|---|
| KP289418 | 2013 | China         | Genbank | C4 | I |
| KP308403 | 2012 | Cambodia      | Genbank | C4 | I |
| KP308409 | 2012 | Cambodia      | Genbank | C4 | I |
| KP308423 | 2012 | Cambodia      | Genbank | C4 | I |
| KP308428 | 2012 | Cambodia      | Genbank | C4 | I |
| KP308430 | 2012 | Cambodia      | Genbank | B5 | H |
| KP308438 | 2012 | Cambodia      | Genbank | C4 | I |
| KP308449 | 2012 | Cambodia      | Genbank | C4 | I |
| KP308451 | 2012 | Cambodia      | Genbank | C4 | I |
| KP308459 | 2012 | Cambodia      | Genbank | C4 | I |
| KP691658 | 2013 | Vietnam       | Genbank | B5 | H |
| KP691665 | 2011 | Vietnam       | Genbank | C4 | I |
| KR045297 | 2012 | Thailand      | Genbank | B5 | H |
| KR045298 | 2012 | Thailand      | Genbank | B5 | H |
| KR045301 | 2014 | Thailand      | Genbank | B5 | H |
| KU254596 | 2014 | China         | Genbank | C4 | I |
| KU641507 | 2015 | Germany       | Genbank | C1 | Q |
| KU641508 | 2015 | Germany       | Genbank | C1 | Q |
| KX139462 | 2015 | Germany       | Genbank | C1 | Q |
| KX197460 | 2012 | Cambodia      | Genbank | C4 | I |
| KX197464 | 2012 | Cambodia      | Genbank | C4 | I |
| KX197465 | 2012 | Cambodia      | Genbank | C4 | I |
| KX372308 | 2006 | Thailand      | Genbank | C4 | K |
| KX372309 | 2008 | Thailand      | Genbank | C4 | K |
| KX372316 | 2012 | Thailand      | Genbank | B5 | H |
| KX372319 | 2012 | Thailand      | Genbank | B5 | H |
| KX372324 | 2013 | Thailand      | Genbank | C2 | E |
| KX430823 | 2014 | Vietnam       | Genbank | B5 | H |
| KY014080 | 2008 | China         | Genbank | C4 | I |
| KY425527 | 2013 | China         | Genbank | C4 | I |
| KY888025 | 2016 | United States | Genbank | C2 | E |
| KY888026 | 2016 | United States | Genbank | C1 | Q |
| LC321990 | 2017 | Japan         | Genbank | C1 | Q |
| LT719065 | 2004 | Madagascar    | Genbank | F  | J |
| LT719066 | 2008 | Cameroon      | Genbank | F  | J |
| LT719067 | 2008 | Cameroon      | Genbank | C1 | E |
| MF362981 | 2010 | China         | Genbank | C4 | I |
| MG367596 | 2016 | Danmark       | Genbank | C1 | Q |
| MG367598 | 2016 | Danmark       | Genbank | C1 | Q |
| MG432108 | 1987 | Singapore     | Genbank | B2 | D |
| MG672478 | 2013 | Nigeria       | Genbank | E  | P |
| MG756691 | 2016 | China         | Genbank | C4 | I |
| MG756695 | 2015 | China         | Genbank | B5 | H |
| MG756699 | 2005 | China         | Genbank | C4 | I |



|             |      |               |            |    |   |
|-------------|------|---------------|------------|----|---|
| MG756703    | 2005 | China         | Genbank    | C4 | I |
| MG756706    | 2008 | China         | Genbank    | B5 | H |
| MG756720    | 2011 | China         | Genbank    | C4 | I |
| MG756722    | 2011 | China         | Genbank    | C4 | I |
| MG756746    | 2012 | China         | Genbank    | B5 | H |
| MG773122    | 2014 | China         | Genbank    | C4 | I |
| MG773123    | 2014 | China         | Genbank    | C4 | I |
| MG976581    | 2016 | United States | Genbank    | C2 | E |
| MH718269    | 2018 | United States | Genbank    | C1 | Q |
| YN/P35      | 2019 | China         | This study | C4 | I |
| YN/P53      | 2019 | China         | This study | C4 | I |
| SD/RZ151    | 2016 | China         | This study | C4 | I |
| SD/RZ313    | 2016 | China         | This study | C4 | I |
| GS/SC158    | 2019 | China         | This study | C4 | I |
| HB/SC232    | 2017 | China         | This study | C4 | I |
| GS/SC291    | 2019 | China         | This study | C4 | I |
| HB/SC358    | 2017 | China         | This study | C4 | I |
| HB/SC375    | 2017 | China         | This study | C4 | I |
| HB/SC376    | 2017 | China         | This study | C4 | I |
| HB/SC39     | 2019 | China         | This study | C4 | I |
| GS/SC582    | 2018 | China         | This study | C4 | I |
| YN/SCF256   | 2016 | China         | This study | C4 | I |
| YN/SCF259   | 2016 | China         | This study | C4 | I |
| YN/SCF264   | 2016 | China         | This study | C4 | I |
| YN/SCF276   | 2016 | China         | This study | C4 | I |
| YN/SCF284   | 2016 | China         | This study | C4 | I |
| YN/SCF285   | 2016 | China         | This study | C4 | I |
| YN/SCF288   | 2016 | China         | This study | C4 | I |
| YN/SCF292   | 2016 | China         | This study | C4 | I |
| YN/SCF303   | 2016 | China         | This study | C4 | I |
| YN/SCF314   | 2016 | China         | This study | C4 | I |
| YN/SCF327   | 2016 | China         | This study | C4 | I |
| YN/SCF329   | 2016 | China         | This study | C4 | I |
| NX/SZS47    | 2018 | China         | This study | C4 | I |
| U22521/BrCr | 1970 | United States | Genbank    | A  | A |
| U22522      | 1987 | United States | Genbank    | B2 | D |
| SD/WF305    | 2019 | China         | This study | C4 | I |
| NX/WZ94     | 2018 | China         | This study | C4 | I |
| CQ/Y86      | 2016 | China         | This study | C4 | I |
| NX/YC188    | 2018 | China         | This study | C4 | I |
| SD/YT194    | 2016 | China         | This study | C4 | I |

---

Supplementary Table S4. Information on 256 global EV-A71 for temporal dynamics analysis.

| Strain name/Genbank No. | Isolated year | Country | Source     | Genotype/subgenotype | Evolutionary lineage |
|-------------------------|---------------|---------|------------|----------------------|----------------------|
| ZJ/10                   | 2016          | China   | This study | C4                   | I                    |
| ZJ/110                  | 2017          | China   | This study | C4                   | I                    |
| BJ/13                   | 2018          | China   | This study | C4                   | I                    |
| XJ/13                   | 2018          | China   | This study | C4                   | I                    |
| TJ/1321Y                | 2016          | China   | This study | C4                   | I                    |
| SX/164                  | 2017          | China   | This study | C4                   | I                    |
| GS/165                  | 2018          | China   | This study | C4                   | I                    |
| BJ/17                   | 2017          | China   | This study | C4                   | I                    |
| HB/181                  | 2017          | China   | This study | C4                   | I                    |
| BJ/19                   | 2018          | China   | This study | C4                   | I                    |
| HaN/19                  | 2017          | China   | This study | C4                   | I                    |
| HLJ/19                  | 2017          | China   | This study | C4                   | I                    |
| BJ/22                   | 2017          | China   | This study | C4                   | I                    |
| GD/22                   | 2018          | China   | This study | C4                   | I                    |
| SD/238                  | 2017          | China   | This study | C4                   | I                    |
| HaN/24                  | 2018          | China   | This study | C4                   | I                    |
| HeN/250                 | 2018          | China   | This study | C4                   | I                    |
| JX/26                   | 2018          | China   | This study | C4                   | I                    |
| LN/26-67                | 2017          | China   | This study | C4                   | I                    |
| HB/269                  | 2018          | China   | This study | C4                   | I                    |
| HeN/276                 | 2017          | China   | This study | C4                   | I                    |
| HeN/287                 | 2017          | China   | This study | C4                   | I                    |
| XJ/3                    | 2018          | China   | This study | C4                   | I                    |
| HeN/313                 | 2017          | China   | This study | C4                   | I                    |
| GS/373                  | 2017          | China   | This study | C4                   | I                    |
| HuN/39                  | 2016          | China   | This study | C4                   | I                    |
| JX/39                   | 2017          | China   | This study | C4                   | I                    |
| CQ/4                    | 2017          | China   | This study | C4                   | I                    |
| AH/50                   | 2017          | China   | This study | C4                   | I                    |
| SC/50                   | 2016          | China   | This study | C4                   | I                    |
| GS/520                  | 2017          | China   | This study | C4                   | I                    |
| TJ/53                   | 2017          | China   | This study | C4                   | I                    |
| GD/58                   | 2018          | China   | This study | C4                   | I                    |
| JX/59                   | 2016          | China   | This study | C4                   | I                    |
| HaN/6                   | 2017          | China   | This study | C4                   | I                    |
| QH/63                   | 2017          | China   | This study | C4                   | I                    |
| AH/65                   | 2017          | China   | This study | C4                   | I                    |
| HLJ/66                  | 2018          | China   | This study | C4                   | I                    |
| CQ/68                   | 2016          | China   | This study | C4                   | I                    |
| SX/69                   | 2018          | China   | This study | C4                   | I                    |
| HLJ/71                  | 2018          | China   | This study | C4                   | I                    |

|           |      |            |            |    |   |
|-----------|------|------------|------------|----|---|
| GD/8      | 2017 | China      | This study | C4 | I |
| JL/83     | 2018 | China      | This study | C4 | I |
| XJ/83     | 2016 | China      | This study | C4 | I |
| SX/86     | 2017 | China      | This study | C4 | I |
| BJ/9      | 2018 | China      | This study | C4 | I |
| GS/9      | 2016 | China      | This study | C4 | I |
| XJ/93     | 2016 | China      | This study | C4 | I |
| HeN/a5    | 2018 | China      | This study | C4 | I |
| YN/A50    | 2017 | China      | This study | C4 | I |
| YN/A80    | 2018 | China      | This study | C4 | I |
| AB575911  | 1966 | Nederlands | Genbank    | B0 | B |
| AB575912  | 1966 | Nederlands | Genbank    | B0 | B |
| AB575935  | 1991 | Nederlands | Genbank    | C1 | E |
| AB575937  | 2001 | Nederlands | Genbank    | C1 | E |
| AB575942  | 2007 | Nederlands | Genbank    | C2 | E |
| AF136379  | 1998 | China      | Genbank    | C2 | E |
| AF304457  | 1998 | China      | Genbank    | C2 | E |
| AM396585  | 1997 | Malaysia   | Genbank    | C2 | E |
| AM396586  | 1997 | Malaysia   | Genbank    | B3 | F |
| YN/B89    | 2017 | China      | This study | C4 | I |
| YN/C76    | 2018 | China      | This study | C4 | I |
| YN/C99    | 2018 | China      | This study | C4 | I |
| YN/D28    | 2016 | China      | This study | C4 | I |
| DQ341354  | 1998 | Singapore  | Genbank    | B3 | F |
| DQ341355  | 2000 | Korea      | Genbank    | C3 | G |
| DQ341356  | 2000 | Korea      | Genbank    | C3 | G |
| DQ341357  | 1999 | Australia  | Genbank    | C2 | E |
| DQ341358  | 2000 | Malaysia   | Genbank    | C1 | E |
| DQ341359  | 1998 | Malaysia   | Genbank    | C1 | E |
| DQ341361  | 2000 | Australia  | Genbank    | C1 | E |
| DQ341363  | 2003 | Malaysia   | Genbank    | B5 | H |
| DQ341365  | 2001 | Malaysia   | Genbank    | B4 | H |
| DQ341368  | 1997 | Malaysia   | Genbank    | B3 | F |
| DQ381846  | 1999 | Australia  | Genbank    | C2 | E |
| EF063152  | 2006 | China      | Genbank    | C5 | L |
| TJ/ET0520 | 2016 | China      | Genbank    | C4 | I |
| EU364841  | 1999 | Australia  | Genbank    | B3 | F |
| EU527983  | 2007 | China      | Genbank    | C5 | L |
| EU703812  | 2008 | China      | Genbank    | C4 | I |
| EU703813  | 2008 | China      | Genbank    | C4 | I |
| YN/F257   | 2016 | China      | This study | C4 | I |
| HuN/F55   | 2016 | China      | This study | C4 | I |
| HuN/FC47  | 2016 | China      | This study | C4 | I |
| FJ172159  | 2008 | Singapore  | Genbank    | C2 | E |

|          |      |           |            |    |   |
|----------|------|-----------|------------|----|---|
| FJ194965 | 2008 | China     | Genbank    | C4 | I |
| FJ357373 | 2004 | China     | Genbank    | C4 | I |
| FJ357376 | 2001 | China     | Genbank    | B4 | H |
| FJ357378 | 2003 | China     | Genbank    | B5 | H |
| FJ357380 | 1986 | China     | Genbank    | B1 | C |
| FJ357381 | 1986 | China     | Genbank    | B1 | C |
| FJ360545 | 2008 | China     | Genbank    | C4 | I |
| FJ461781 | 2008 | Singapore | Genbank    | B5 | H |
| FJ606450 | 2008 | China     | Genbank    | C4 | N |
| FJ713137 | 2009 | China     | Genbank    | C4 | I |
| GQ231929 | 2004 | China     | Genbank    | C4 | I |
| GQ231935 | 2008 | China     | Genbank    | B5 | H |
| GQ231936 | 2008 | China     | Genbank    | B5 | H |
| GU459071 | 2008 | China     | Genbank    | C4 | I |
| NX/GY038 | 2017 | China     | This study | C4 | I |
| NY/GY096 | 2017 | China     | This study | C4 | I |
| HM156065 | 2009 | China     | Genbank    | B5 | H |
| HM245927 | 2010 | China     | Genbank    | C4 | I |
| HM622390 | 2009 | China     | Genbank    | B5 | H |
| HM622391 | 2008 | China     | Genbank    | C2 | M |
| HM622392 | 2008 | China     | Genbank    | C2 | M |
| HQ426649 | 2010 | China     | Genbank    | C4 | I |
| HQ647167 | 2007 | Canada    | Genbank    | C2 | E |
| HQ647177 | 2007 | Canada    | Genbank    | C2 | E |
| HQ647179 | 2006 | Canada    | Genbank    | C4 | I |
| HQ694984 | 2008 | China     | Genbank    | C4 | I |
| HQ694985 | 2008 | China     | Genbank    | C4 | I |
| HQ825317 | 2008 | China     | Genbank    | C4 | I |
| HQ891923 | 2009 | China     | Genbank    | C4 | I |
| YN/I12   | 2019 | China     | This study | C4 | I |
| YN/I13   | 2016 | China     | This study | C4 | I |
| YN/J48   | 2017 | China     | This study | C4 | I |
| JF738000 | 2009 | Thailand  | Genbank    | C1 | E |
| JF820312 | 2010 | China     | Genbank    | C4 | I |
| JF830007 | 2010 | China     | Genbank    | C4 | I |
| JN052925 | 2011 | China     | Genbank    | C4 | I |
| JN864019 | 2010 | China     | Genbank    | C4 | I |
| JQ280307 | 2008 | China     | Genbank    | C2 | M |
| JQ319054 | 2009 | China     | Genbank    | C4 | I |
| JQ639384 | 2011 | China     | Genbank    | C4 | I |
| JQ681218 | 2008 | China     | Genbank    | C4 | I |
| JQ742002 | 2001 | China     | Genbank    | C4 | I |
| JX244182 | 2009 | China     | Genbank    | C4 | I |
| JX244184 | 2009 | China     | Genbank    | C4 | I |

|          |      |          |            |    |   |
|----------|------|----------|------------|----|---|
| JX244187 | 2010 | China    | Genbank    | C4 | I |
| HLJ/JX80 | 2016 | China    | This study | C4 | I |
| KC296443 | 2011 | Vietnam  | Genbank    | C4 | I |
| KC296444 | 2011 | Vietnam  | Genbank    | C5 | L |
| KC296445 | 2011 | Vietnam  | Genbank    | C4 | I |
| KC414134 | 2011 | China    | Genbank    | C4 | O |
| KF142412 | 2013 | China    | Genbank    | C4 | I |
| KF142413 | 2013 | China    | Genbank    | C4 | I |
| KF543271 | 2012 | Cambodia | Genbank    | C4 | I |
| KF974782 | 2008 | China    | Genbank    | B5 | H |
| KF974793 | 2012 | China    | Genbank    | B5 | H |
| KF974794 | 2012 | China    | Genbank    | B5 | H |
| KF974796 | 2012 | China    | Genbank    | B5 | H |
| KJ186973 | 2010 | China    | Genbank    | C4 | I |
| KJ400360 | 2013 | Russia   | Genbank    | C4 | I |
| KJ686131 | 2012 | Vietnam  | Genbank    | B5 | H |
| KJ686137 | 2012 | Vietnam  | Genbank    | B5 | H |
| KJ686144 | 2012 | Vietnam  | Genbank    | C5 | L |
| KJ686155 | 2012 | Vietnam  | Genbank    | C4 | I |
| KJ686165 | 2011 | Vietnam  | Genbank    | C4 | I |
| KJ686176 | 2012 | Vietnam  | Genbank    | B5 | H |
| KJ686178 | 2011 | Vietnam  | Genbank    | C5 | L |
| KJ686179 | 2011 | Vietnam  | Genbank    | C5 | L |
| KJ686190 | 2011 | Vietnam  | Genbank    | C4 | I |
| KJ686200 | 2011 | Vietnam  | Genbank    | C4 | I |
| KJ686220 | 2012 | Vietnam  | Genbank    | C4 | I |
| KJ686230 | 2011 | Vietnam  | Genbank    | C5 | L |
| KJ686239 | 2011 | Vietnam  | Genbank    | C4 | I |
| KJ686240 | 2012 | Vietnam  | Genbank    | C4 | I |
| KJ686252 | 2012 | Vietnam  | Genbank    | C4 | I |
| KJ686254 | 2012 | Vietnam  | Genbank    | C4 | I |
| KJ686255 | 2011 | Vietnam  | Genbank    | C4 | I |
| KJ686259 | 2012 | Vietnam  | Genbank    | C4 | I |
| KJ686274 | 2012 | Vietnam  | Genbank    | C4 | I |
| KJ686285 | 2012 | Vietnam  | Genbank    | C4 | I |
| KJ686290 | 2011 | Vietnam  | Genbank    | C4 | I |
| KJ686293 | 2012 | Vietnam  | Genbank    | C4 | I |
| KJ686303 | 2011 | Vietnam  | Genbank    | C4 | I |
| KJ686306 | 2012 | Vietnam  | Genbank    | C4 | I |
| KJ784495 | 2011 | China    | Genbank    | C4 | O |
| KJ784496 | 2012 | China    | Genbank    | C4 | I |
| KM055005 | 2011 | Laos     | Genbank    | C4 | I |
| KP198624 | 2012 | China    | Genbank    | C4 | I |
| KP274875 | 2011 | China    | Genbank    | C4 | I |

|          |      |               |         |    |   |
|----------|------|---------------|---------|----|---|
| KP274877 | 2011 | China         | Genbank | B4 | H |
| KP289418 | 2013 | China         | Genbank | C4 | I |
| KP308403 | 2012 | Cambodia      | Genbank | C4 | I |
| KP308409 | 2012 | Cambodia      | Genbank | C4 | I |
| KP308423 | 2012 | Cambodia      | Genbank | C4 | I |
| KP308428 | 2012 | Cambodia      | Genbank | C4 | I |
| KP308430 | 2012 | Cambodia      | Genbank | B5 | H |
| KP308438 | 2012 | Cambodia      | Genbank | C4 | I |
| KP308449 | 2012 | Cambodia      | Genbank | C4 | I |
| KP308451 | 2012 | Cambodia      | Genbank | C4 | I |
| KP308459 | 2012 | Cambodia      | Genbank | C4 | I |
| KP691658 | 2013 | Vietnam       | Genbank | B5 | H |
| KP691665 | 2011 | Vietnam       | Genbank | C4 | I |
| KR045297 | 2012 | Thailand      | Genbank | B5 | H |
| KR045298 | 2012 | Thailand      | Genbank | B5 | H |
| KR045301 | 2014 | Thailand      | Genbank | B5 | H |
| KU254596 | 2014 | China         | Genbank | C4 | I |
| KU641507 | 2015 | Germany       | Genbank | C1 | Q |
| KU641508 | 2015 | Germany       | Genbank | C1 | Q |
| KX139462 | 2015 | Germany       | Genbank | C1 | Q |
| KX197460 | 2012 | Cambodia      | Genbank | C4 | I |
| KX197464 | 2012 | Cambodia      | Genbank | C4 | I |
| KX197465 | 2012 | Cambodia      | Genbank | C4 | I |
| KX372308 | 2006 | Thailand      | Genbank | C4 | K |
| KX372309 | 2008 | Thailand      | Genbank | C4 | K |
| KX372316 | 2012 | Thailand      | Genbank | B5 | H |
| KX372319 | 2012 | Thailand      | Genbank | B5 | H |
| KX372324 | 2013 | Thailand      | Genbank | C2 | E |
| KX430823 | 2014 | Vietnam       | Genbank | B5 | H |
| KY014080 | 2008 | China         | Genbank | C4 | I |
| KY425527 | 2013 | China         | Genbank | C4 | I |
| KY888025 | 2016 | United States | Genbank | C2 | E |
| KY888026 | 2016 | United States | Genbank | C1 | Q |
| LC321990 | 2017 | Japan         | Genbank | C1 | Q |
| LT719067 | 2008 | Cameroon      | Genbank | C1 | E |
| MF362981 | 2010 | China         | Genbank | C4 | I |
| MG367596 | 2016 | Danmark       | Genbank | C1 | Q |
| MG367598 | 2016 | Danmark       | Genbank | C1 | Q |
| MG432108 | 1987 | Singapore     | Genbank | B2 | D |
| MG672478 | 2013 | Nigeria       | Genbank | E  | P |
| MG756691 | 2016 | China         | Genbank | C4 | I |
| MG756695 | 2015 | China         | Genbank | B5 | H |
| MG756699 | 2005 | China         | Genbank | C4 | I |
| MG756703 | 2005 | China         | Genbank | C4 | I |

|           |      |               |            |    |   |
|-----------|------|---------------|------------|----|---|
| MG756706  | 2008 | China         | Genbank    | B5 | H |
| MG756720  | 2011 | China         | Genbank    | C4 | I |
| MG756722  | 2011 | China         | Genbank    | C4 | I |
| MG756746  | 2012 | China         | Genbank    | B5 | H |
| MG773122  | 2014 | China         | Genbank    | C4 | I |
| MG773123  | 2014 | China         | Genbank    | C4 | I |
| MG976581  | 2016 | United States | Genbank    | C2 | E |
| MH718269  | 2018 | United States | Genbank    | C1 | Q |
| YN/P35    | 2019 | China         | This study | C4 | I |
| YN/P53    | 2019 | China         | This study | C4 | I |
| SD/RZ151  | 2016 | China         | This study | C4 | I |
| SD/RZ313  | 2016 | China         | This study | C4 | I |
| GS/SC158  | 2019 | China         | This study | C4 | I |
| HB/SC232  | 2017 | China         | This study | C4 | I |
| GS/SC291  | 2019 | China         | This study | C4 | I |
| HB/SC358  | 2017 | China         | This study | C4 | I |
| HB/SC375  | 2017 | China         | This study | C4 | I |
| HB/SC376  | 2017 | China         | This study | C4 | I |
| HB/SC39   | 2019 | China         | This study | C4 | I |
| GS/SC582  | 2018 | China         | This study | C4 | I |
| YN/SCF256 | 2016 | China         | This study | C4 | I |
| YN/SCF259 | 2016 | China         | This study | C4 | I |
| YN/SCF264 | 2016 | China         | This study | C4 | I |
| YN/SCF276 | 2016 | China         | This study | C4 | I |
| YN/SCF284 | 2016 | China         | This study | C4 | I |
| YN/SCF285 | 2016 | China         | This study | C4 | I |
| YN/SCF288 | 2016 | China         | This study | C4 | I |
| YN/SCF292 | 2016 | China         | This study | C4 | I |
| YN/SCF303 | 2016 | China         | This study | C4 | I |
| YN/SCF314 | 2016 | China         | This study | C4 | I |
| YN/SCF327 | 2016 | China         | This study | C4 | I |
| YN/SCF329 | 2016 | China         | This study | C4 | I |
| NX/SZS47  | 2018 | China         | This study | C4 | I |
| U22522    | 1987 | United States | Genbank    | B2 | D |
| SD/WF305  | 2019 | China         | This study | C4 | I |
| NX/WZ94   | 2018 | China         | This study | C4 | I |
| CQ/Y86    | 2016 | China         | This study | C4 | I |
| NX/YC188  | 2018 | China         | This study | C4 | I |
| SD/YT194  | 2016 | China         | This study | C4 | I |

---

Supplementary Table S5. Information on 85 Asian B5 for phylogeographic analysis.

| Strain name/Genbank No. | Isolated year | Country         | Source  | Genotype/subgenotype | Evolutionary lineage |
|-------------------------|---------------|-----------------|---------|----------------------|----------------------|
| EU527985                | 2007          | Taiwan of China | Genbank | B5                   | H                    |
| GQ231925                | 2008          | Taiwan of China | Genbank | B5                   | H                    |
| GQ231935                | 2008          | Taiwan of China | Genbank | B5                   | H                    |
| GQ231941                | 2008          | Taiwan of China | Genbank | B5                   | H                    |
| HM156065                | 2009          | Taiwan of China | Genbank | B5                   | H                    |
| HM622390                | 2009          | Taiwan of China | Genbank | B5                   | H                    |
| JF738001                | 2009          | Thailand        | Genbank | B5                   | H                    |
| KF134486                | 2011          | Taiwan of China | Genbank | B5                   | H                    |
| KF154355                | 2012          | Taiwan of China | Genbank | B5                   | H                    |
| KF306100                | 2011          | Taiwan of China | Genbank | B5                   | H                    |
| KF974779                | 2008          | Taiwan of China | Genbank | B5                   | H                    |
| KF974781                | 2008          | Taiwan of China | Genbank | B5                   | H                    |
| KF974786                | 2008          | Taiwan of China | Genbank | B5                   | H                    |
| KF974789                | 2008          | Taiwan of China | Genbank | B5                   | H                    |
| KF974791                | 2012          | Taiwan of China | Genbank | B5                   | H                    |
| KF974794                | 2012          | Taiwan of China | Genbank | B5                   | H                    |
| KF974797                | 2012          | Taiwan of China | Genbank | B5                   | H                    |
| KJ686128                | 2012          | Vietnam         | Genbank | B5                   | H                    |
| KJ686131                | 2012          | Vietnam         | Genbank | B5                   | H                    |
| KJ686137                | 2012          | Vietnam         | Genbank | B5                   | H                    |
| KJ686140                | 2012          | Vietnam         | Genbank | B5                   | H                    |
| KJ686176                | 2012          | Vietnam         | Genbank | B5                   | H                    |
| KJ686192                | 2012          | Vietnam         | Genbank | B5                   | H                    |
| KJ686211                | 2012          | Vietnam         | Genbank | B5                   | H                    |
| KJ686222                | 2012          | Vietnam         | Genbank | B5                   | H                    |
| KJ686225                | 2012          | Vietnam         | Genbank | B5                   | H                    |
| KJ686234                | 2012          | Vietnam         | Genbank | B5                   | H                    |
| KJ686264                | 2012          | Vietnam         | Genbank | B5                   | H                    |
| KJ686270                | 2012          | Vietnam         | Genbank | B5                   | H                    |
| KJ686277                | 2012          | Vietnam         | Genbank | B5                   | H                    |
| KJ686296                | 2012          | Vietnam         | Genbank | B5                   | H                    |
| KJ686297                | 2011          | Vietnam         | Genbank | B5                   | H                    |
| KJ686302                | 2012          | Vietnam         | Genbank | B5                   | H                    |
| KP691648                | 2013          | Vietnam         | Genbank | B5                   | H                    |
| KP691653                | 2013          | Vietnam         | Genbank | B5                   | H                    |
| KP691658                | 2013          | Vietnam         | Genbank | B5                   | H                    |
| KP691661                | 2013          | Vietnam         | Genbank | B5                   | H                    |
| KR045291                | 2012          | Thailand        | Genbank | B5                   | H                    |
| KR045292                | 2012          | Thailand        | Genbank | B5                   | H                    |
| KR045293                | 2012          | Thailand        | Genbank | B5                   | H                    |
| KR045294                | 2012          | Thailand        | Genbank | B5                   | H                    |
| KR045295                | 2012          | Thailand        | Genbank | B5                   | H                    |



|          |      |                 |         |    |   |
|----------|------|-----------------|---------|----|---|
| KR045296 | 2012 | Thailand        | Genbank | B5 | H |
| KR045297 | 2012 | Thailand        | Genbank | B5 | H |
| KR045298 | 2012 | Thailand        | Genbank | B5 | H |
| KR045299 | 2012 | Thailand        | Genbank | B5 | H |
| KR045300 | 2013 | Thailand        | Genbank | B5 | H |
| KR045301 | 2014 | Thailand        | Genbank | B5 | H |
| KU574619 | 2011 | Thailand        | Genbank | B5 | H |
| KX372310 | 2011 | Thailand        | Genbank | B5 | H |
| KX372311 | 2011 | Thailand        | Genbank | B5 | H |
| KX372312 | 2011 | Thailand        | Genbank | B5 | H |
| KX372313 | 2011 | Thailand        | Genbank | B5 | H |
| KX372314 | 2012 | Thailand        | Genbank | B5 | H |
| KX372315 | 2012 | Thailand        | Genbank | B5 | H |
| KX372316 | 2012 | Thailand        | Genbank | B5 | H |
| KX372317 | 2012 | Thailand        | Genbank | B5 | H |
| KX372318 | 2012 | Thailand        | Genbank | B5 | H |
| KX372319 | 2012 | Thailand        | Genbank | B5 | H |
| KX372320 | 2012 | Thailand        | Genbank | B5 | H |
| KX372321 | 2012 | Thailand        | Genbank | B5 | H |
| KX372323 | 2013 | Thailand        | Genbank | B5 | H |
| KX372325 | 2013 | Thailand        | Genbank | B5 | H |
| KX372326 | 2013 | Thailand        | Genbank | B5 | H |
| KX372327 | 2013 | Thailand        | Genbank | B5 | H |
| KX372329 | 2014 | Thailand        | Genbank | B5 | H |
| KX372330 | 2014 | Thailand        | Genbank | B5 | H |
| KX372331 | 2014 | Thailand        | Genbank | B5 | H |
| KX430823 | 2014 | Vietnam         | Genbank | B5 | H |
| KX430824 | 2014 | Vietnam         | Genbank | B5 | H |
| KY952186 | 2011 | Thailand        | Genbank | B5 | H |
| MG756694 | 2015 | Taiwan of China | Genbank | B5 | H |
| MG756695 | 2015 | Taiwan of China | Genbank | B5 | H |
| MG756706 | 2008 | Taiwan of China | Genbank | B5 | H |
| MG756709 | 2008 | Taiwan of China | Genbank | B5 | H |
| MG756712 | 2008 | Taiwan of China | Genbank | B5 | H |
| MG756721 | 2011 | Taiwan of China | Genbank | B5 | H |
| MG756723 | 2011 | Taiwan of China | Genbank | B5 | H |
| MG756728 | 2012 | Taiwan of China | Genbank | B5 | H |
| MG756732 | 2012 | Taiwan of China | Genbank | B5 | H |
| MG756736 | 2012 | Taiwan of China | Genbank | B5 | H |
| MG756744 | 2012 | Taiwan of China | Genbank | B5 | H |
| MG756748 | 2012 | Taiwan of China | Genbank | B5 | H |
| MG756750 | 2012 | Taiwan of China | Genbank | B5 | H |
| MG756754 | 2013 | Taiwan of China | Genbank | B5 | H |

---

Supplementary Table S6. Information on 170 Asian C4 for phylogeographic analysis.

| Strain name/Genbank No. | Isolated year | Country | Source     | Genotype/subgenotype | Evolutionary lineage |
|-------------------------|---------------|---------|------------|----------------------|----------------------|
| LN/11-11                | 2017          | China   | This study | C4                   | I                    |
| XJ/13                   | 2018          | China   | This study | C4                   | I                    |
| SX/164                  | 2017          | China   | This study | C4                   | I                    |
| SC/17                   | 2016          | China   | This study | C4                   | I                    |
| AH/2                    | 2016          | China   | This study | C4                   | I                    |
| JL/20                   | 2018          | China   | This study | C4                   | I                    |
| JX/21                   | 2017          | China   | This study | C4                   | I                    |
| GD/22                   | 2018          | China   | This study | C4                   | I                    |
| HuN/39                  | 2016          | China   | This study | C4                   | I                    |
| EU131776                | 2002          | China   | Genbank    | C4                   | I                    |
| EU812515                | 2008          | China   | Genbank    | C4                   | I                    |
| FJ606449                | 2008          | China   | Genbank    | C4                   | I                    |
| FJ606450                | 2008          | China   | Genbank    | C4                   | N                    |
| FJ607337                | 2008          | China   | Genbank    | C4                   | N                    |
| GQ231926                | 2005          | China   | Genbank    | C4                   | I                    |
| GQ231928                | 2004          | China   | Genbank    | C4                   | I                    |
| GQ231930                | 2004          | China   | Genbank    | C4                   | I                    |
| GQ994989                | 2009          | China   | Genbank    | C4                   | I                    |
| GU198369                | 2008          | China   | Genbank    | C4                   | I                    |
| GU396280                | 2009          | China   | Genbank    | C4                   | I                    |
| HM245927                | 2010          | China   | Genbank    | C4                   | I                    |
| HQ129932                | 2006          | China   | Genbank    | C4                   | I                    |
| HQ423142                | 2009          | China   | Genbank    | C4                   | O                    |
| HQ423143                | 2009          | China   | Genbank    | C4                   | O                    |
| HQ694986                | 2010          | China   | Genbank    | C4                   | I                    |
| YN/I12                  | 2019          | China   | This study | C4                   | I                    |
| JF894381                | 2011          | China   | Genbank    | C4                   | I                    |
| JQ742001                | 2001          | China   | Genbank    | C4                   | I                    |
| JQ742002                | 2001          | China   | Genbank    | C4                   | I                    |
| JX111888                | 2011          | China   | Genbank    | C4                   | I                    |
| JX678874                | 2003          | China   | Genbank    | C4                   | I                    |
| JX678882                | 2007          | China   | Genbank    | C4                   | I                    |
| JX678885                | 2002          | China   | Genbank    | C4                   | I                    |
| JX678886                | 2002          | China   | Genbank    | C4                   | I                    |
| KC296443                | 2011          | Vietnam | Genbank    | C4                   | I                    |
| KC414134                | 2011          | China   | Genbank    | C4                   | O                    |
| KC436265                | 2004          | China   | Genbank    | C4                   | I                    |
| KC436267                | 2006          | China   | Genbank    | C4                   | I                    |
| KC436268                | 2007          | China   | Genbank    | C4                   | I                    |
| KC436271                | 2009          | China   | Genbank    | C4                   | I                    |
| KC570452                | 2012          | China   | Genbank    | C4                   | I                    |
| KC954662                | 2007          | China   | Genbank    | C4                   | I                    |

|          |      |          |         |    |   |
|----------|------|----------|---------|----|---|
| KF142411 | 2013 | China    | Genbank | C4 | I |
| KF543271 | 2012 | Cambodia | Genbank | C4 | I |
| KF826491 | 2012 | China    | Genbank | C4 | I |
| KJ004554 | 2012 | China    | Genbank | C4 | I |
| KJ186974 | 2011 | China    | Genbank | C4 | I |
| KJ508182 | 2012 | China    | Genbank | C4 | I |
| KJ632498 | 2011 | China    | Genbank | C4 | I |
| KJ686127 | 2011 | Vietnam  | Genbank | C4 | I |
| KJ686129 | 2012 | Vietnam  | Genbank | C4 | I |
| KJ686135 | 2012 | Vietnam  | Genbank | C4 | I |
| KJ686136 | 2011 | Vietnam  | Genbank | C4 | I |
| KJ686139 | 2012 | Vietnam  | Genbank | C4 | I |
| KJ686143 | 2011 | Vietnam  | Genbank | C4 | I |
| KJ686147 | 2011 | Vietnam  | Genbank | C4 | I |
| KJ686148 | 2012 | Vietnam  | Genbank | C4 | I |
| KJ686150 | 2012 | Vietnam  | Genbank | C4 | I |
| KJ686154 | 2011 | Vietnam  | Genbank | C4 | I |
| KJ686155 | 2012 | Vietnam  | Genbank | C4 | I |
| KJ686160 | 2012 | Vietnam  | Genbank | C4 | I |
| KJ686164 | 2011 | Vietnam  | Genbank | C4 | I |
| KJ686166 | 2011 | Vietnam  | Genbank | C4 | I |
| KJ686169 | 2011 | Vietnam  | Genbank | C4 | I |
| KJ686173 | 2011 | Vietnam  | Genbank | C4 | I |
| KJ686180 | 2012 | Vietnam  | Genbank | C4 | I |
| KJ686182 | 2011 | Vietnam  | Genbank | C4 | I |
| KJ686185 | 2011 | Vietnam  | Genbank | C4 | I |
| KJ686189 | 2011 | Vietnam  | Genbank | C4 | I |
| KJ686194 | 2012 | Vietnam  | Genbank | C4 | I |
| KJ686196 | 2012 | Vietnam  | Genbank | C4 | I |
| KJ686199 | 2012 | Vietnam  | Genbank | C4 | I |
| KJ686200 | 2011 | Vietnam  | Genbank | C4 | I |
| KJ686202 | 2012 | Vietnam  | Genbank | C4 | I |
| KJ686205 | 2012 | Vietnam  | Genbank | C4 | I |
| KJ686209 | 2011 | Vietnam  | Genbank | C4 | I |
| KJ686210 | 2012 | Vietnam  | Genbank | C4 | I |
| KJ686216 | 2012 | Vietnam  | Genbank | C4 | I |
| KJ686218 | 2011 | Vietnam  | Genbank | C4 | I |
| KJ686226 | 2012 | Vietnam  | Genbank | C4 | I |
| KJ686228 | 2011 | Vietnam  | Genbank | C4 | I |
| KJ686233 | 2011 | Vietnam  | Genbank | C4 | I |
| KJ686239 | 2011 | Vietnam  | Genbank | C4 | I |
| KJ686243 | 2012 | Vietnam  | Genbank | C4 | I |
| KJ686245 | 2012 | Vietnam  | Genbank | C4 | I |
| KJ686250 | 2012 | Vietnam  | Genbank | C4 | I |

|          |      |          |         |    |   |
|----------|------|----------|---------|----|---|
| KJ686253 | 2012 | Vietnam  | Genbank | C4 | I |
| KJ686257 | 2011 | Vietnam  | Genbank | C4 | I |
| KJ686259 | 2012 | Vietnam  | Genbank | C4 | I |
| KJ686267 | 2012 | Vietnam  | Genbank | C4 | I |
| KJ686272 | 2011 | Vietnam  | Genbank | C4 | I |
| KJ686274 | 2012 | Vietnam  | Genbank | C4 | I |
| KJ686278 | 2011 | Vietnam  | Genbank | C4 | I |
| KJ686284 | 2011 | Vietnam  | Genbank | C4 | I |
| KJ686285 | 2012 | Vietnam  | Genbank | C4 | I |
| KJ686289 | 2012 | Vietnam  | Genbank | C4 | I |
| KJ686290 | 2011 | Vietnam  | Genbank | C4 | I |
| KJ686295 | 2012 | Vietnam  | Genbank | C4 | I |
| KJ686299 | 2011 | Vietnam  | Genbank | C4 | I |
| KJ686301 | 2011 | Vietnam  | Genbank | C4 | I |
| KJ784495 | 2011 | China    | Genbank | C4 | O |
| KM211580 | 2012 | China    | Genbank | C4 | I |
| KP198623 | 2012 | China    | Genbank | C4 | I |
| KP266579 | 2006 | China    | Genbank | C4 | I |
| KP274875 | 2011 | China    | Genbank | C4 | I |
| KP289421 | 2013 | China    | Genbank | C4 | I |
| KP308401 | 2012 | Cambodia | Genbank | C4 | I |
| KP308402 | 2012 | Cambodia | Genbank | C4 | I |
| KP308403 | 2012 | Cambodia | Genbank | C4 | I |
| KP308405 | 2012 | Cambodia | Genbank | C4 | I |
| KP308407 | 2012 | Cambodia | Genbank | C4 | I |
| KP308408 | 2012 | Cambodia | Genbank | C4 | I |
| KP308409 | 2012 | Cambodia | Genbank | C4 | I |
| KP308412 | 2012 | Cambodia | Genbank | C4 | I |
| KP308414 | 2012 | Cambodia | Genbank | C4 | I |
| KP308415 | 2012 | Cambodia | Genbank | C4 | I |
| KP308418 | 2012 | Cambodia | Genbank | C4 | I |
| KP308419 | 2012 | Cambodia | Genbank | C4 | I |
| KP308421 | 2012 | Cambodia | Genbank | C4 | I |
| KP308422 | 2012 | Cambodia | Genbank | C4 | I |
| KP308423 | 2012 | Cambodia | Genbank | C4 | I |
| KP308424 | 2012 | Cambodia | Genbank | C4 | I |
| KP308428 | 2012 | Cambodia | Genbank | C4 | I |
| KP308429 | 2012 | Cambodia | Genbank | C4 | I |
| KP308431 | 2013 | Cambodia | Genbank | C4 | I |
| KP308432 | 2012 | Cambodia | Genbank | C4 | I |
| KP308433 | 2012 | Cambodia | Genbank | C4 | I |
| KP308434 | 2012 | Cambodia | Genbank | C4 | I |
| KP308436 | 2012 | Cambodia | Genbank | C4 | I |
| KP308437 | 2012 | Cambodia | Genbank | C4 | I |

|          |      |          |            |    |   |
|----------|------|----------|------------|----|---|
| KP308438 | 2012 | Cambodia | Genbank    | C4 | I |
| KP308439 | 2012 | Cambodia | Genbank    | C4 | I |
| KP308440 | 2012 | Cambodia | Genbank    | C4 | I |
| KP308441 | 2012 | Cambodia | Genbank    | C4 | I |
| KP308442 | 2012 | Cambodia | Genbank    | C4 | I |
| KP308443 | 2012 | Cambodia | Genbank    | C4 | I |
| KP308444 | 2012 | Cambodia | Genbank    | C4 | I |
| KP308449 | 2012 | Cambodia | Genbank    | C4 | I |
| KP308450 | 2012 | Cambodia | Genbank    | C4 | N |
| KP308451 | 2012 | Cambodia | Genbank    | C4 | I |
| KP308452 | 2012 | Cambodia | Genbank    | C4 | I |
| KP308453 | 2012 | Cambodia | Genbank    | C4 | I |
| KP308457 | 2012 | Cambodia | Genbank    | C4 | I |
| KP308458 | 2013 | Cambodia | Genbank    | C4 | I |
| KP308459 | 2012 | Cambodia | Genbank    | C4 | I |
| KT428646 | 2014 | China    | Genbank    | C4 | I |
| KU254595 | 2014 | China    | Genbank    | C4 | I |
| KX197455 | 2012 | Cambodia | Genbank    | C4 | I |
| KX197456 | 2012 | Cambodia | Genbank    | C4 | I |
| KX197457 | 2012 | Cambodia | Genbank    | C4 | I |
| KX197458 | 2012 | Cambodia | Genbank    | C4 | I |
| KX197460 | 2012 | Cambodia | Genbank    | C4 | I |
| KX197461 | 2012 | Cambodia | Genbank    | C4 | I |
| KX197462 | 2012 | Cambodia | Genbank    | C4 | I |
| KX197463 | 2012 | Cambodia | Genbank    | C4 | I |
| KX197464 | 2012 | Cambodia | Genbank    | C4 | I |
| KX197465 | 2012 | Cambodia | Genbank    | C4 | I |
| KX893543 | 2015 | China    | Genbank    | C4 | I |
| KY315729 | 2015 | China    | Genbank    | C4 | I |
| MF431793 | 2013 | China    | Genbank    | C4 | I |
| MG756693 | 2015 | China    | Genbank    | C4 | I |
| MG756696 | 2005 | China    | Genbank    | C4 | I |
| MG756701 | 2005 | China    | Genbank    | C4 | I |
| MG756715 | 2010 | China    | Genbank    | C4 | I |
| MG756720 | 2011 | China    | Genbank    | C4 | I |
| MG756724 | 2012 | China    | Genbank    | C4 | I |
| MG756725 | 2012 | China    | Genbank    | C4 | I |
| MG773123 | 2014 | China    | Genbank    | C4 | I |
| HB/SC39  | 2019 | China    | This study | C4 | I |
| SD/WF305 | 2019 | China    | This study | C4 | I |

---

Supplementary Table S7. Information on 234 China C4 for phylogeographic analysis.

| Strain name/Genbank No. | Isolated province | Isolated year | Isolated region | Source     | Genotype/subgenotype | Evolutionary lineage |
|-------------------------|-------------------|---------------|-----------------|------------|----------------------|----------------------|
| GX/000601               | Guangxi           | 2017          | South China     | This study | C4                   | I                    |
| LN/11-11                | Liaoning          | 2017          | Northeast China | This study | C4                   | I                    |
| TJ/116                  | Tianjing          | 2016          | North China     | This study | C4                   | I                    |
| GD/122                  | Guangdong         | 2017          | South China     | This study | C4                   | I                    |
| XJ/13                   | Xinjiang          | 2018          | Northwest China | This study | C4                   | I                    |
| GS/133                  | Gansu             | 2019          | Northwest China | This study | C4                   | I                    |
| SX/164                  | Shanxi            | 2017          | North China     | This study | C4                   | I                    |
| GS/165                  | Gansu             | 2018          | Northwest China | This study | C4                   | I                    |
| BJ/17                   | Beijing           | 2017          | North China     | This study | C4                   | I                    |
| SC/17                   | Sichuan           | 2016          | Southwest China | This study | C4                   | I                    |
| SX/18                   | Shanxi            | 2018          | North China     | This study | C4                   | I                    |
| HB/187                  | Hebei             | 2017          | North China     | This study | C4                   | I                    |
| BJ/19                   | Beijing           | 2018          | North China     | This study | C4                   | I                    |
| HLJ/19                  | Heilongjiang      | 2017          | Northeast China | This study | C4                   | I                    |
| HB/195                  | Hebei             | 2016          | North China     | This study | C4                   | I                    |
| AH/2                    | Anhui             | 2016          | East China      | This study | C4                   | I                    |
| CQ/20                   | Chongqing         | 2017          | Southwest China | This study | C4                   | I                    |
| JL/20                   | Jilin             | 2018          | Northeast China | This study | C4                   | I                    |
| JL/21                   | Jilin             | 2018          | Northeast China | This study | C4                   | I                    |
| JX/21                   | Jiangxi           | 2017          | East China      | This study | C4                   | I                    |
| BJ/22                   | Beijing           | 2017          | North China     | This study | C4                   | I                    |
| GD/22                   | Guangdong         | 2018          | South China     | This study | C4                   | I                    |
| JL/23                   | Jilin             | 2018          | Northeast China | This study | C4                   | I                    |
| HB/232                  | Hebei             | 2016          | North China     | This study | C4                   | I                    |
| HaN/24                  | Hainan            | 2018          | South China     | This study | C4                   | I                    |
| HB/24                   | Hebei             | 2018          | North China     | This study | C4                   | I                    |
| SC/24                   | Sichuan           | 2016          | Southwest China | This study | C4                   | I                    |
| HeN/250                 | Henan             | 2018          | Central China   | This study | C4                   | I                    |
| JX/26                   | Jiangxi           | 2018          | East China      | This study | C4                   | I                    |
| SaX/26                  | Shaanxi           | 2017          | Northwest China | This study | C4                   | I                    |
| LN/26-53                | Liaoning          | 2017          | Northeast China | This study | C4                   | I                    |
| LN/26-67                | Liaoning          | 2017          | Northeast China | This study | C4                   | I                    |
| HB/269                  | Hebei             | 2018          | North China     | This study | C4                   | I                    |
| HeN/276                 | Henan             | 2017          | Central China   | This study | C4                   | I                    |
| HeN/287                 | Henan             | 2017          | Central China   | This study | C4                   | I                    |
| GS/3                    | Gansu             | 2016          | Northwest China | This study | C4                   | I                    |
| TJ/3                    | Tianjing          | 2018          | North China     | This study | C4                   | I                    |
| HeN/313                 | Henan             | 2017          | Central China   | This study | C4                   | I                    |
| TJ/320                  | Tianjing          | 2016          | North China     | This study | C4                   | I                    |
| HLJ/34                  | Heilongjiang      | 2017          | Northeast China | This study | C4                   | I                    |
| HaN/35                  | Hainan            | 2018          | South China     | This study | C4                   | I                    |
| SaX/35                  | Shaanxi           | 2017          | Northwest China | This study | C4                   | I                    |

|          |              |      |                 |            |    |   |
|----------|--------------|------|-----------------|------------|----|---|
| GS/375   | Gansu        | 2017 | Northwest China | This study | C4 | I |
| HuN/39   | Hunan        | 2016 | Central China   | This study | C4 | I |
| CQ/4     | Chongqing    | 2017 | Southwest China | This study | C4 | I |
| GS/41    | Gansu        | 2016 | Northwest China | This study | C4 | I |
| QH/44    | Qinghai      | 2017 | Northwest China | This study | C4 | I |
| HaN/5    | Hainan       | 2017 | South China     | This study | C4 | I |
| CQ/52    | Chongqing    | 2016 | Southwest China | This study | C4 | I |
| TJ/53    | Tianjing     | 2017 | North China     | This study | C4 | I |
| GD/57    | Guangdong    | 2018 | South China     | This study | C4 | I |
| JX/59    | Jiangxi      | 2016 | East China      | This study | C4 | I |
| HaN/6    | Hainan       | 2017 | South China     | This study | C4 | I |
| QH/63    | Qinghai      | 2017 | Northwest China | This study | C4 | I |
| AH/64    | Anhui        | 2017 | East China      | This study | C4 | I |
| HLJ/66   | Heilongjiang | 2018 | Northeast China | This study | C4 | I |
| HLJ/67   | Heilongjiang | 2018 | Northeast China | This study | C4 | I |
| XJ/70    | Xinjiang     | 2016 | Northwest China | This study | C4 | I |
| HLJ/71   | Heilongjiang | 2018 | Northeast China | This study | C4 | I |
| HuN/71   | Hunan        | 2016 | Central China   | This study | C4 | I |
| JX/76    | Jiangxi      | 2016 | East China      | This study | C4 | I |
| XJ/78    | Xinjiang     | 2016 | Northwest China | This study | C4 | I |
| HLJ/79   | Heilongjiang | 2018 | Northeast China | This study | C4 | I |
| GD/8     | Guangdong    | 2017 | South China     | This study | C4 | I |
| HLJ/80   | Heilongjiang | 2018 | Northeast China | This study | C4 | I |
| JL/82    | Jilin        | 2018 | Northeast China | This study | C4 | I |
| JL/83    | Jilin        | 2018 | Northeast China | This study | C4 | I |
| XJ/83    | Xinjiang     | 2016 | Northwest China | This study | C4 | I |
| BJ/9     | Beijing      | 2018 | North China     | This study | C4 | I |
| GS/9     | Gansu        | 2016 | Northwest China | This study | C4 | I |
| XJ/93    | Xinjiang     | 2016 | Northwest China | This study | C4 | I |
| HeN/a4   | Henan        | 2018 | Central China   | This study | C4 | I |
| HeN/a5   | Henan        | 2018 | Central China   | This study | C4 | I |
| YN/A50   | Yunnan       | 2017 | Southwest China | This study | C4 | I |
| YN/A80   | Yunnan       | 2018 | Southwest China | This study | C4 | I |
| YN/A96   | Yunnan       | 2016 | Southwest China | This study | C4 | I |
| YN/B89   | Yunnan       | 2017 | Southwest China | This study | C4 | I |
| YN/C76   | Yunnan       | 2018 | Southwest China | This study | C4 | I |
| YN/C99   | Yunnan       | 2018 | Southwest China | This study | C4 | I |
| EU131776 | Taiwan       | 2002 | Taiwan of China | Genbank    | C4 | I |
| EU812515 | Anhui        | 2008 | East China      | Genbank    | C4 | I |
| YN/F257  | Yunnan       | 2016 | Southwest China | This study | C4 | I |
| HuN/FC47 | Hunan        | 2016 | Central China   | This study | C4 | I |
| FJ194964 | Guangdong    | 2008 | South China     | Genbank    | C4 | I |
| FJ360544 | Guizhou      | 2008 | Southwest China | Genbank    | C4 | I |
| FJ360545 | Guizhou      | 2008 | Southwest China | Genbank    | C4 | I |

|          |           |      |                 |            |    |   |
|----------|-----------|------|-----------------|------------|----|---|
| FJ439769 | Anhui     | 2008 | East China      | Genbank    | C4 | I |
| FJ606449 | Beijing   | 2008 | North China     | Genbank    | C4 | I |
| FJ606450 | Beijing   | 2008 | North China     | Genbank    | C4 | N |
| FJ607335 | Guangdong | 2008 | South China     | Genbank    | C4 | I |
| FJ607337 | Guangdong | 2008 | South China     | Genbank    | C4 | N |
| GQ231926 | Taiwan    | 2005 | Taiwan of China | Genbank    | C4 | I |
| GQ231928 | Taiwan    | 2004 | Taiwan of China | Genbank    | C4 | I |
| GQ231930 | Taiwan    | 2004 | Taiwan of China | Genbank    | C4 | I |
| GQ231931 | Taiwan    | 2004 | Taiwan of China | Genbank    | C4 | I |
| GQ231932 | Taiwan    | 2004 | Taiwan of China | Genbank    | C4 | I |
| GQ231933 | Taiwan    | 2008 | Taiwan of China | Genbank    | C4 | I |
| GQ231937 | Taiwan    | 2005 | Taiwan of China | Genbank    | C4 | I |
| GQ231940 | Taiwan    | 2004 | Taiwan of China | Genbank    | C4 | I |
| GQ279369 | HongKong  | 2008 | South China     | Genbank    | C4 | I |
| GQ892830 | Guangxi   | 2008 | South China     | Genbank    | C4 | I |
| GQ994988 | Anhui     | 2009 | East China      | Genbank    | C4 | I |
| GQ994989 | Chongqing | 2009 | Southwest China | Genbank    | C4 | I |
| GQ994990 | Chongqing | 2009 | Southwest China | Genbank    | C4 | I |
| GQ994991 | Chongqing | 2009 | Southwest China | Genbank    | C4 | I |
| GQ994992 | Henan     | 2009 | Central China   | Genbank    | C4 | I |
| GU198369 | Anhui     | 2008 | East China      | Genbank    | C4 | I |
| GU396280 | Gansu     | 2009 | Northwest China | Genbank    | C4 | I |
| GU459071 | Anhui     | 2008 | East China      | Genbank    | C4 | I |
| NX/GY038 | Ningxia   | 2017 | Northwest China | This study | C4 | I |
| HM002485 | Beijing   | 2008 | North China     | Genbank    | C4 | I |
| HM002489 | Beijing   | 2009 | North China     | Genbank    | C4 | I |
| HM053669 | Beijing   | 2008 | North China     | Genbank    | C4 | I |
| HM053670 | Beijing   | 2009 | North China     | Genbank    | C4 | I |
| HM245927 | Henan     | 2010 | Central China   | Genbank    | C4 | I |
| HQ129932 | Beijing   | 2006 | North China     | Genbank    | C4 | I |
| HQ407557 | Liaoning  | 2010 | Northeast China | Genbank    | C4 | I |
| HQ423142 | Yunnan    | 2009 | Southwest China | Genbank    | C4 | O |
| HQ423143 | Yunnan    | 2009 | Southwest China | Genbank    | C4 | O |
| HQ694985 | Anhui     | 2008 | East China      | Genbank    | C4 | I |
| HQ694986 | Anhui     | 2010 | East China      | Genbank    | C4 | I |
| HQ850973 | Fujian    | 2010 | East China      | Genbank    | C4 | I |
| HQ998852 | Henan     | 2009 | Central China   | Genbank    | C4 | I |
| YN/I12   | Yunnan    | 2019 | Southwest China | This study | C4 | I |
| YN/I13   | Yunnan    | 2016 | Southwest China | This study | C4 | I |
| YN/J48   | Yunnan    | 2017 | Southwest China | This study | C4 | I |
| JF820313 | Beijing   | 2010 | North China     | Genbank    | C4 | I |
| JF820314 | Beijing   | 2010 | North China     | Genbank    | C4 | I |
| JF894381 | Beijing   | 2011 | North China     | Genbank    | C4 | I |
| JF894382 | Beijing   | 2011 | North China     | Genbank    | C4 | I |



|           |              |      |                 |            |    |   |
|-----------|--------------|------|-----------------|------------|----|---|
| JF894383  | Beijing      | 2011 | North China     | Genbank    | C4 | I |
| JN052925  | Henan        | 2011 | Central China   | Genbank    | C4 | I |
| JN230523  | Hubei        | 2009 | Central China   | Genbank    | C4 | I |
| JN256060  | Henan        | 2009 | Central China   | Genbank    | C4 | I |
| JQ086366  | Zhejiang     | 2011 | East China      | Genbank    | C4 | I |
| JQ517316  | Henan        | 2010 | Central China   | Genbank    | C4 | I |
| JQ681218  | Henan        | 2008 | Central China   | Genbank    | C4 | I |
| JQ708209  | Beijing      | 2010 | North China     | Genbank    | C4 | I |
| JQ708210  | Beijing      | 2009 | North China     | Genbank    | C4 | I |
| JQ742001  | Guangxi      | 2001 | South China     | Genbank    | C4 | I |
| JQ742002  | Guangxi      | 2001 | South China     | Genbank    | C4 | I |
| JQ804832  | Hubei        | 2010 | Central China   | Genbank    | C4 | I |
| JX111888  | Guangdong    | 2011 | South China     | Genbank    | C4 | I |
| JX111889  | Guangdong    | 2011 | South China     | Genbank    | C4 | I |
| JX111891  | Guangdong    | 2011 | South China     | Genbank    | C4 | I |
| HLJ/JX114 | Heilongjiang | 2016 | Northeast China | This study | C4 | I |
| HLJ/JX119 | Heilongjiang | 2016 | Northeast China | This study | C4 | I |
| JX244183  | Shandong     | 2009 | East China      | Genbank    | C4 | I |
| JX678874  | Chongqing    | 2003 | Southwest China | Genbank    | C4 | I |
| JX678877  | Anhui        | 2008 | East China      | Genbank    | C4 | I |
| JX678882  | Shandong     | 2007 | East China      | Genbank    | C4 | I |
| JX678883  | Shandong     | 2009 | East China      | Genbank    | C4 | I |
| JX678885  | Shanghai     | 2002 | East China      | Genbank    | C4 | I |
| JX678886  | Shanghai     | 2002 | East China      | Genbank    | C4 | I |
| HLJ/JX77  | Heilongjiang | 2016 | Northeast China | This study | C4 | I |
| HLJ/JX80  | Heilongjiang | 2016 | Northeast China | This study | C4 | I |
| JX986737  | Hubei        | 2011 | Central China   | Genbank    | C4 | I |
| JX986738  | Hubei        | 2011 | Central China   | Genbank    | C4 | I |
| KC414134  | Jilin        | 2011 | Northeast China | Genbank    | C4 | O |
| KC436265  | HongKong     | 2004 | South China     | Genbank    | C4 | I |
| KC436267  | HongKong     | 2006 | South China     | Genbank    | C4 | I |
| KC436268  | HongKong     | 2007 | South China     | Genbank    | C4 | I |
| KC436269  | HongKong     | 2008 | South China     | Genbank    | C4 | I |
| KC436271  | HongKong     | 2009 | South China     | Genbank    | C4 | I |
| KC436272  | HongKong     | 2010 | South China     | Genbank    | C4 | I |
| KC570452  | Shanghai     | 2012 | East China      | Genbank    | C4 | I |
| KC954662  | Anhui        | 2007 | East China      | Genbank    | C4 | I |
| KF142411  | Hunan        | 2013 | Central China   | Genbank    | C4 | I |
| KF142412  | Hunan        | 2013 | Central China   | Genbank    | C4 | I |
| KF142413  | Hunan        | 2013 | Central China   | Genbank    | C4 | I |
| KF826491  | Jiangsu      | 2012 | East China      | Genbank    | C4 | I |
| KJ004552  | Hunan        | 2011 | Central China   | Genbank    | C4 | I |
| KJ004554  | Hunan        | 2012 | Central China   | Genbank    | C4 | I |
| KJ004556  | Ningxia      | 2010 | Northwest China | Genbank    | C4 | I |

|          |           |      |                 |         |    |   |
|----------|-----------|------|-----------------|---------|----|---|
| KJ004557 | Ningxia   | 2010 | Northwest China | Genbank | C4 | I |
| KJ004559 | Guangdong | 2010 | South China     | Genbank | C4 | I |
| KJ004560 | Guangdong | 2010 | South China     | Genbank | C4 | I |
| KJ186974 | Taiwan    | 2011 | Taiwan of China | Genbank | C4 | I |
| KJ508182 | Hubei     | 2012 | Central China   | Genbank | C4 | I |
| KJ632498 | Zhejiang  | 2011 | East China      | Genbank | C4 | I |
| KJ784495 | Zhejiang  | 2011 | East China      | Genbank | C4 | O |
| KM211580 | Henan     | 2012 | Central China   | Genbank | C4 | I |
| KM591215 | Hubei     | 2010 | Central China   | Genbank | C4 | I |
| KM593929 | Taiwan    | 2011 | Taiwan of China | Genbank | C4 | I |
| KP198623 | Hubei     | 2012 | Central China   | Genbank | C4 | I |
| KP266579 | Jiangsu   | 2006 | East China      | Genbank | C4 | I |
| KP274875 | Taiwan    | 2011 | Taiwan of China | Genbank | C4 | I |
| KP289421 | Zhejiang  | 2013 | East China      | Genbank | C4 | I |
| KP289428 | Zhejiang  | 2013 | East China      | Genbank | C4 | I |
| KT428644 | Guangdong | 2014 | South China     | Genbank | C4 | I |
| KT428646 | Guangdong | 2014 | South China     | Genbank | C4 | I |
| KT428649 | Guangdong | 2014 | South China     | Genbank | C4 | I |
| KU254595 | Beijing   | 2014 | North China     | Genbank | C4 | I |
| KU254596 | Beijing   | 2014 | North China     | Genbank | C4 | I |
| KX893543 | Yunnan    | 2015 | Southwest China | Genbank | C4 | I |
| KY315729 | Shandong  | 2015 | East China      | Genbank | C4 | I |
| KY425527 | Yunnan    | 2013 | Southwest China | Genbank | C4 | I |
| KY612315 | Jiangsu   | 2015 | East China      | Genbank | C4 | I |
| MF362981 | Guangdong | 2010 | South China     | Genbank | C4 | I |
| MF431793 | Guangdong | 2013 | South China     | Genbank | C4 | I |
| MG520666 | Jiangsu   | 2017 | East China      | Genbank | C4 | I |
| MG756691 | Taiwan    | 2016 | Taiwan of China | Genbank | C4 | I |
| MG756692 | Taiwan    | 2016 | Taiwan of China | Genbank | C4 | I |
| MG756693 | Taiwan    | 2015 | Taiwan of China | Genbank | C4 | I |
| MG756696 | Taiwan    | 2005 | Taiwan of China | Genbank | C4 | I |
| MG756699 | Taiwan    | 2005 | Taiwan of China | Genbank | C4 | I |
| MG756701 | Taiwan    | 2005 | Taiwan of China | Genbank | C4 | I |
| MG756703 | Taiwan    | 2005 | Taiwan of China | Genbank | C4 | I |
| MG756715 | Taiwan    | 2010 | Taiwan of China | Genbank | C4 | I |
| MG756716 | Taiwan    | 2010 | Taiwan of China | Genbank | C4 | I |
| MG756717 | Taiwan    | 2010 | Taiwan of China | Genbank | C4 | I |
| MG756719 | Taiwan    | 2010 | Taiwan of China | Genbank | C4 | I |
| MG756720 | Taiwan    | 2011 | Taiwan of China | Genbank | C4 | I |
| MG756722 | Taiwan    | 2011 | Taiwan of China | Genbank | C4 | I |
| MG756724 | Taiwan    | 2012 | Taiwan of China | Genbank | C4 | I |
| MG756725 | Taiwan    | 2012 | Taiwan of China | Genbank | C4 | I |
| MG773123 | Anhui     | 2014 | East China      | Genbank | C4 | I |
| MG773125 | Anhui     | 2014 | East China      | Genbank | C4 | I |

|           |           |      |                 |            |    |   |
|-----------|-----------|------|-----------------|------------|----|---|
| YN/P35    | Yunnan    | 2019 | Southwest China | This study | C4 | I |
| YN/P53    | Yunnan    | 2019 | Southwest China | This study | C4 | I |
| GS/SC158  | Gansu     | 2019 | Northwest China | This study | C4 | I |
| GS/SC291  | Gansu     | 2019 | Northwest China | This study | C4 | I |
| HB/SC353  | Hebei     | 2017 | North China     | This study | C4 | I |
| HB/SC39   | Hebei     | 2019 | North China     | This study | C4 | I |
| GS/SC476  | Gansu     | 2017 | Northwest China | This study | C4 | I |
| GS/SC477  | Gansu     | 2017 | Northwest China | This study | C4 | I |
| GS/SC576  | Gansu     | 2018 | Northwest China | This study | C4 | I |
| GS/SC708  | Gansu     | 2018 | Northwest China | This study | C4 | I |
| YN/SCF276 | Yunnan    | 2016 | Southwest China | This study | C4 | I |
| SD/WF305  | Shandong  | 2019 | East China      | This study | C4 | I |
| NX/WZ90   | Ningxia   | 2018 | Northwest China | This study | C4 | I |
| NX/WZ94   | Ningxia   | 2018 | Northwest China | This study | C4 | I |
| CQ/Y86    | Chongqing | 2016 | Southwest China | This study | C4 | I |
| NX/YC188  | Ningxia   | 2018 | Northwest China | This study | C4 | I |

---

Supplementary Table S8. Marginal likelihood estimation of the molecular clock model and coalescent model for 256 global EV-A71 sequences. The best-fitting model combination was highlighted in bolded font.

| Molecular clock model                        | Coalescent tree prior | PS              | SS              |
|----------------------------------------------|-----------------------|-----------------|-----------------|
| Strict clock                                 | Bayesian SkyGrid      | -17209.8        | -17248.0        |
| Strict clock                                 | Bayesian Skyline      | -17196.3        | -17246.8        |
| Strict clock                                 | Constant Size         | -17218.3        | -17254.0        |
| Strict clock                                 | Exponential Growth    | -17205.5        | -17228.1        |
| Strict clock                                 | GMRF Bayesian Skyride | -17293.9        | -17341.2        |
| Uncorrelated relaxed clock(exponential)      | Bayesian SkyGrid      | -17257.2        | -17303.5        |
| Uncorrelated relaxed clock(exponential)      | Bayesian Skyline      | -17243.0        | -17291.6        |
| Uncorrelated relaxed clock(exponential)      | Constant Size         | -17268.4        | -17293.7        |
| Uncorrelated relaxed clock(exponential)      | Exponential Growth    | -17256.4        | -17295.4        |
| Uncorrelated relaxed clock(exponential)      | GMRF Bayesian Skyride | -17333.4        | -17366.5        |
| Uncorrelated relaxed clock(lognormal)        | Bayesian SkyGrid      | -17179.1        | -17221.8        |
| Uncorrelated relaxed clock(lognormal)        | Bayesian Skyline      | -17183.1        | -17232.7        |
| <b>Uncorrelated relaxed clock(lognormal)</b> | <b>Constant Size</b>  | <b>-17182.2</b> | <b>-17199.6</b> |
| Uncorrelated relaxed clock(lognormal)        | Exponential Growth    | -17185.8        | -17216.8        |
| Uncorrelated relaxed clock(lognormal)        | GMRF Bayesian Skyride | -17255.4        | -17312.0        |

Supplementary Table S9. Marginal likelihood estimation of the molecular clock model and coalescent model for 85 Asian B5 sequences. The best-fitting model combination was highlighted in bolded font.

| Molecular clock model                        | Coalescent tree prior   | PS             | SS             |
|----------------------------------------------|-------------------------|----------------|----------------|
| Strict clock                                 | Bayesian SkyGrid        | -3937.4        | -3935.7        |
| Strict clock                                 | Bayesian Skyline        | -3929.6        | -3928.7        |
| Strict clock                                 | Constant Size           | -3935.7        | -3932.3        |
| Strict clock                                 | Exponential Growth      | -3931.0        | -3929.3        |
| Strict clock                                 | GMRF Bayesian Skyride   | -3946.4        | -3944.8        |
| Uncorrelated relaxed clock(exponential)      | Bayesian SkyGrid        | -3943.3        | -3939.8        |
| Uncorrelated relaxed clock(exponential)      | Bayesian Skyline        | -3941.1        | -3936.2        |
| Uncorrelated relaxed clock(exponential)      | Constant Size           | -3942.6        | -3938.6        |
| Uncorrelated relaxed clock(exponential)      | Exponential Growth      | -3943.3        | -3939.8        |
| Uncorrelated relaxed clock(exponential)      | GMRF Bayesian Skyride   | -3949.2        | -3945.9        |
| Uncorrelated relaxed clock(lognormal)        | Bayesian SkyGrid        | -3933.7        | -3932.8        |
| <b>Uncorrelated relaxed clock(lognormal)</b> | <b>Bayesian Skyline</b> | <b>-3928.2</b> | <b>-3926.4</b> |
| Uncorrelated relaxed clock(lognormal)        | Constant Size           | -3935.7        | -3927.6        |
| Uncorrelated relaxed clock(lognormal)        | Exponential Growth      | -3929.1        | -3928.6        |
| Uncorrelated relaxed clock(lognormal)        | GMRF Bayesian Skyride   | -3943.3        | -3944.6        |

Supplementary Table S10. Marginal likelihood estimation of the molecular clock model and coalescent model for 170 Asian C4 sequences. The best-fitting model combination was highlighted in bolded font.

| Molecular clock model                   | Coalescent tree prior   | PS             | SS             |
|-----------------------------------------|-------------------------|----------------|----------------|
| Strict clock                            | Bayesian SkyGrid        | -8529.3        | -8533.7        |
| <b>Strict clock</b>                     | <b>Bayesian Skyline</b> | <b>-8505.3</b> | <b>-8508.7</b> |
| Strict clock                            | Constant Size           | -8544.3        | -8550.9        |
| Strict clock                            | Exponential Growth      | -8524.8        | -8525.3        |
| Strict clock                            | GMRF Bayesian Skyride   | -8556.9        | -8565.3        |
| Uncorrelated relaxed clock(exponential) | Bayesian SkyGrid        | -8563.0        | -8571.2        |
| Uncorrelated relaxed clock(exponential) | Bayesian Skyline        | -8543.8        | -8553.5        |
| Uncorrelated relaxed clock(exponential) | Constant Size           | -8556.1        | -8553.9        |
| Uncorrelated relaxed clock(exponential) | Exponential Growth      | -8551.5        | -8560.8        |
| Uncorrelated relaxed clock(exponential) | GMRF Bayesian Skyride   | -8579.2        | -8579.2        |
| Uncorrelated relaxed clock(lognormal)   | Bayesian SkyGrid        | -8540.2        | -8542.6        |
| Uncorrelated relaxed clock(lognormal)   | Bayesian Skyline        | -8506.3        | -8514.7        |
| Uncorrelated relaxed clock(lognormal)   | Constant Size           | -8539.0        | -8531.6        |
| Uncorrelated relaxed clock(lognormal)   | Exponential Growth      | -8524.2        | -8533.3        |
| Uncorrelated relaxed clock(lognormal)   | GMRF Bayesian Skyride   | -8551.0        | -8556.2        |

Supplementary Table S11. Marginal likelihood estimation of the molecular clock model and coalescent model for 234 China C4 sequences. The best-fitting model combination was highlighted in bolded font.

| Molecular clock model                        | Coalescent tree prior     | PS              | SS              |
|----------------------------------------------|---------------------------|-----------------|-----------------|
| Strict clock                                 | Bayesian SkyGrid          | -11909.5        | -11928.1        |
| Strict clock                                 | Bayesian Skyline          | -11898.4        | -11919.4        |
| Strict clock                                 | Constant Size             | -11908.5        | -11930.5        |
| Strict clock                                 | Exponential Growth        | -11897.1        | -11921.8        |
| Strict clock                                 | GMRF Bayesian Skyride     | -11923.8        | -11934.8        |
| Uncorrelated relaxed clock(exponential)      | Bayesian SkyGrid          | -11917.7        | -11937.2        |
| Uncorrelated relaxed clock(exponential)      | Bayesian Skyline          | -11910.9        | -11939.2        |
| Uncorrelated relaxed clock(exponential)      | Constant Size             | -11923.0        | -11949.8        |
| Uncorrelated relaxed clock(exponential)      | Exponential Growth        | -11913.3        | -11938.7        |
| Uncorrelated relaxed clock(exponential)      | GMRF Bayesian Skyride     | -11928.3        | -11954.0        |
| Uncorrelated relaxed clock(lognormal)        | Bayesian SkyGrid          | -11891.6        | -11917.0        |
| Uncorrelated relaxed clock(lognormal)        | Bayesian Skyline          | -11872.4        | -11894.1        |
| Uncorrelated relaxed clock(lognormal)        | Constant Size             | -11892.5        | -11901.9        |
| <b>Uncorrelated relaxed clock(lognormal)</b> | <b>Exponential Growth</b> | <b>-11873.3</b> | <b>-11889.6</b> |
| Uncorrelated relaxed clock(lognormal)        | GMRF Bayesian Skyride     | -11897.9        | -11926.5        |

Supplementary table S12. Analysis of the spatial structure of C4 strains in Asia.

| Statistic                  | observed mean (95% HPD CIs) <sup>d</sup> | null mean (95% HPD CIs) | <i>P</i> -value |
|----------------------------|------------------------------------------|-------------------------|-----------------|
| AI <sup>a</sup>            | 1.18(0.71, 1.67)                         | 12.25(10.60, 13.61)     | <0.001          |
| PS <sup>b</sup>            | 12.93(12.00, 14.00)                      | 79.34(72.73, 84.25)     | <0.001          |
| MC <sup>c</sup> (Cambodia) | 15.35(15.00, 17.00)                      | 3.37(2.45, 5.00)        | 0.01            |
| MC (China)                 | 16.42(12.00, 19.00)                      | 2.70(2.05, 4.05)        | 0.01            |
| MC (Vietnam)               | 29.16(29.00, 31.00)                      | 2.57(2.04, 3.24)        | 0.01            |

<sup>a</sup>AI, association index.

<sup>b</sup>PS, parsimony score.

<sup>c</sup>MC, maximum monophyletic clade.

<sup>d</sup>HPD CIs, highest posterior density confidence intervals.

Supplementary Table S13. Statistically supported migration rates of Asian B5 based on the *VPI* region.

| From            | To              | Mean migration rate | Bayes factor (BF) <sup>a</sup> | Indicator |
|-----------------|-----------------|---------------------|--------------------------------|-----------|
| Taiwan of China | Vietnam         | 3.04                | 11050.89                       | 1.00      |
| Thailand        | Taiwan of China | 2.60                | 2761.80                        | 1.00      |
| Vietnam         | Thailand        | 1.60                | 46.21                          | 0.97      |

<sup>a</sup>The BF value > 3 and indicator > 0.50 of statistically supported migration rates are shown.

Supplementary Table S14. Statistically supported migration rates of Asian C4 based on the *VPI* region.

| From    | To       | Mean migration rate | BF <sup>a</sup> | Indicator |
|---------|----------|---------------------|-----------------|-----------|
| Vietnam | Cambodia | 9.40                | 11050.89        | 1.00      |
| China   | Vietnam  | 3.33                | 219.81          | 0.99      |

<sup>a</sup>BF, Bayes factor. The BF value > 3 and indicator > 0.50 of statistically supported migration rates are shown.

Supplementary table S15. Analysis of the spatial structure of C4 strains in China.

| Statistic                       | observed mean (95% HPD CIs) <sup>d</sup> | null mean (95% HPD CIs) | <i>P</i> -value |
|---------------------------------|------------------------------------------|-------------------------|-----------------|
| AI <sup>a</sup>                 | 15.64(14.42, 16.83)                      | 22.14(20.97, 23.33)     | <0.001          |
| PS <sup>b</sup>                 | 128.65(125.00, 132.00)                   | 162.38(156.09, 168.22)  | <0.001          |
| MC <sup>c</sup> (Central China) | 2.24(2.00, 3.00)                         | 1.79(1.03, 2.99)        | 0.36            |
| MC (East China)                 | 5.05(5.00, 6.00)                         | 1.47(1.00, 2.05)        | 0.01            |
| MC (North China)                | 3.09(3.00, 4.00)                         | 1.93(1.37, 2.61)        | 0.04            |
| MC (Northeast China)            | 2.26(2.00, 3.00)                         | 1.75(1.02, 3.00)        | 0.33            |
| MC (Northwest China)            | 2.00(2.00, 2.00)                         | 1.83(1.05, 3.00)        | 0.40            |
| MC (South China)                | 2.17(2.00, 3.00)                         | 1.91(1.16, 2.70)        | 0.46            |
| MC (Southwest China)            | 1.79(1.00, 2.00)                         | 1.74(1.05, 2.27)        | 0.37            |
| MC (Taiwan of China)            | 2.90(2.00, 4.00)                         | 1.69(1.02, 2.24)        | 0.03            |

<sup>a</sup>AI, association index.

<sup>b</sup>PS, parsimony score.

<sup>c</sup>MC, maximum monophyletic clade.

<sup>d</sup>HPD CIs, highest posterior density confidence intervals.



Supplementary Table S16. Statistically supported migration rates of China C4 based on the *VPI* region.

| From            | To              | Mean migration rate | BF <sup>a</sup> | Indicator |
|-----------------|-----------------|---------------------|-----------------|-----------|
| East China      | North China     | 17.02               | 56512.85        | 1.00      |
| East China      | South China     | 21.39               | 56512.85        | 1.00      |
| East China      | Central China   | 22.04               | 56512.85        | 1.00      |
| East China      | Taiwan of China | 6.88                | 2254.49         | 1.00      |
| East China      | Southwest China | 16.90               | 431.85          | 0.99      |
| North China     | Northeast China | 6.84                | 56512.85        | 1.00      |
| North China     | Northwest China | 12.53               | 1816.92         | 1.00      |
| North China     | East China      | 5.78                | 37.36           | 0.86      |
| North China     | Central China   | 3.11                | 21.85           | 0.78      |
| North China     | South China     | 2.72                | 12.32           | 0.66      |
| South China     | Northwest China | 1.44                | 7.58            | 0.55      |
| Southwest China | North China     | 3.11                | 23.85           | 0.79      |
| Southwest China | Northeast China | 1.66                | 20.72           | 0.77      |

<sup>a</sup>BF, Bayes factor. The BF value > 3 and indicator > 0.50 of statistically supported migration rates are shown.

Supplementary Table S17. Selective pressures in *VPI* and  $3D^{pol}$  region of lineage H (contains two subgenotypes B4 and B5), C1(contains two lineages -E, -Q), C2(contains two lineages -E, -M).

| Subgenotype(Lineage) | N <sup>a</sup> | <i>VPI</i> |                                                 |        |                                                 | $3D^{pol}$ |                                                 |        |                                                 |
|----------------------|----------------|------------|-------------------------------------------------|--------|-------------------------------------------------|------------|-------------------------------------------------|--------|-------------------------------------------------|
|                      |                | SLAC       |                                                 | MEME   |                                                 | SLAC       |                                                 | MEME   |                                                 |
|                      |                | dN/dS      | Positively selection site (amino acid position) | dN/dS  | Positively selection site (amino acid position) | dN/dS      | Positively selection site (amino acid position) | dN/dS  | Positively selection site (amino acid position) |
| B4(H)                | 6              | 0.0653     | NA                                              | 0.0583 | NA                                              | 0.0648     | NA                                              | 0.0546 | NA                                              |
| B5(H)                | 142            | 0.0605     | 145                                             | 0.0534 | 98                                              | 0.0703     | NA                                              | 0.0597 | 383                                             |
| C1(E)                | 12             | 0.0090     | NA                                              | 0.0082 | NA                                              | 0.0521     | NA                                              | 0.0464 | NA                                              |
| C1(Q)                | 14             | 0.0458     | NA                                              | 0.0430 | NA                                              | 0.0785     | NA                                              | 0.0682 | NA                                              |
| C2(E)                | 32             | 0.0241     | NA                                              | 0.0224 | NA                                              | 0.0584     | NA                                              | 0.0513 | 173                                             |
| C2(M)                | 3              | 0.4920     | NA                                              | 0.4800 | NA                                              | 0.3730     | NA                                              | 0.3250 | NA                                              |

<sup>a</sup>The number of sequences analyzed in each dataset.

**Fig. S1**

**Geographic and temporal distribution of the 200 newly sequenced EV-A71.** The horizontal coordinate is the geographic distribution and the vertical coordinate is the number of sequences, with the years indicated by different colors.

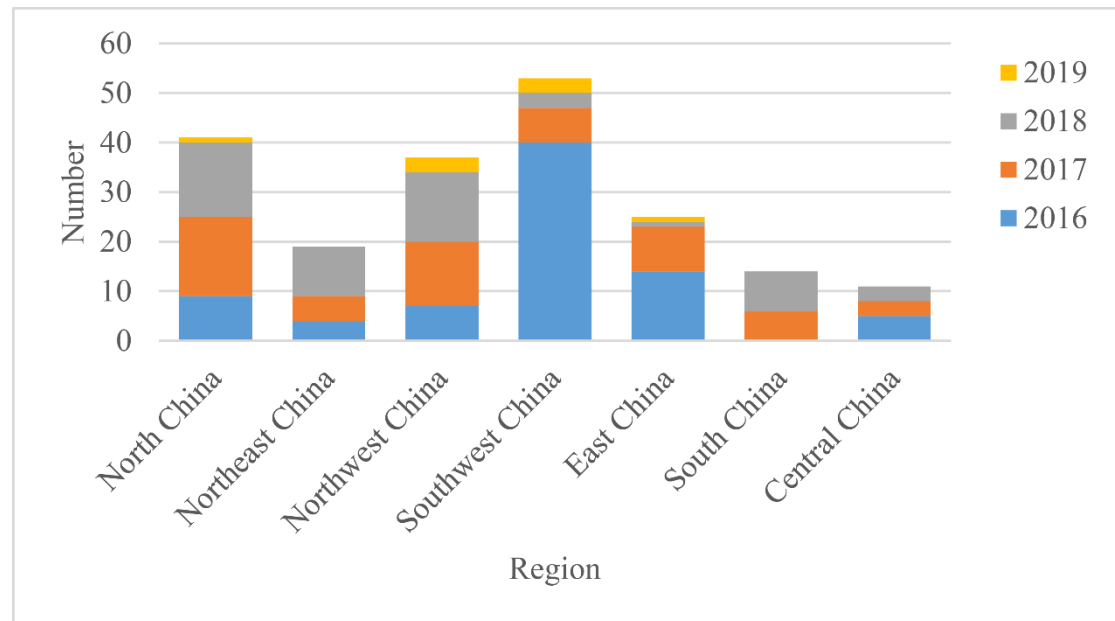

## Fig. S2

**Selection of 259 representative sequences.** A neighbor-joining tree was constructed based on the ORF of 972 global EV-A71 sequences, and 259 representative sequences were selected from them for phylogenetic analysis.

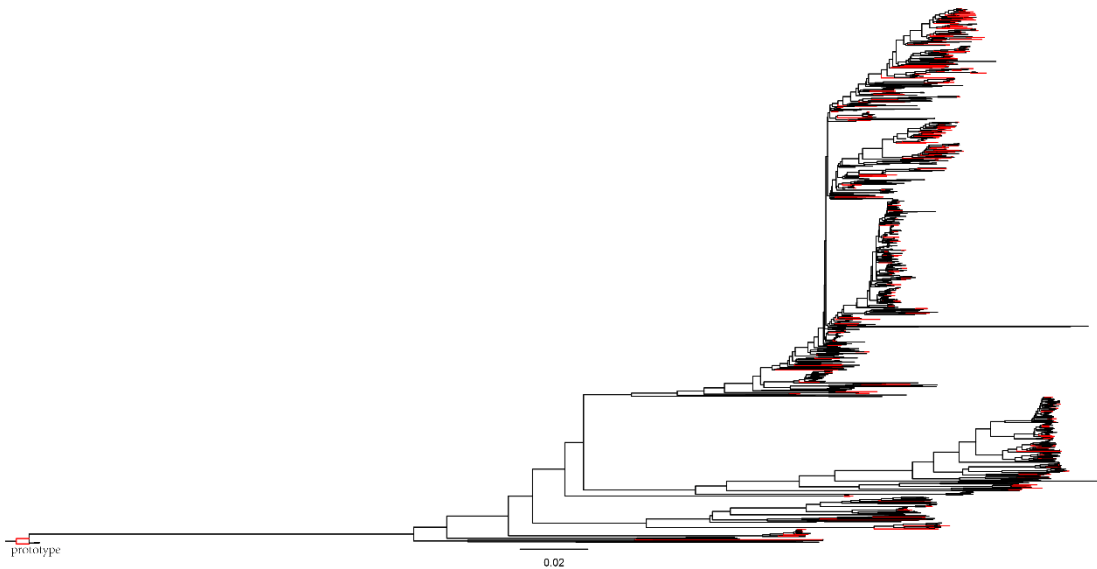

## Fig. S3

**The results of root-to-tip regression analysis and date-randomization test (DRT) in the *VPI* region of the datasets sequence.** Both show results from root-to-tip regression analysis on the left, and DRT results on the right. Only if the 95% credibility interval of the rate estimate does not fall within the 95% credibility intervals of the rate estimates from the date-randomized replicates, the dataset is considered to have sufficient temporal signal for molecular dating(2, 3). A) 256 global *VPI* sequences were used for temporal dynamics analysis; B) 85 Asian *VPI* sequences were used for phylogeographic analysis; C) 170 Asian *VPI* sequences were used for phylogeographic analysis; D) 234 China *VPI* sequences were used for phylogeographic analysis.

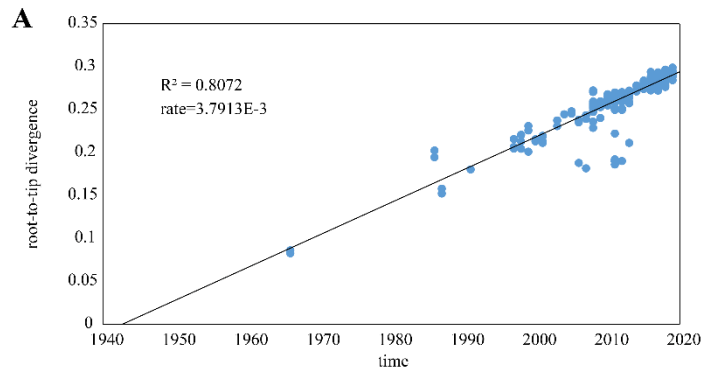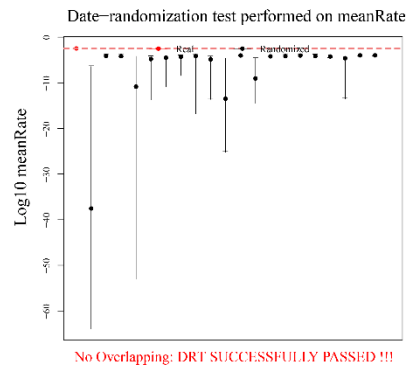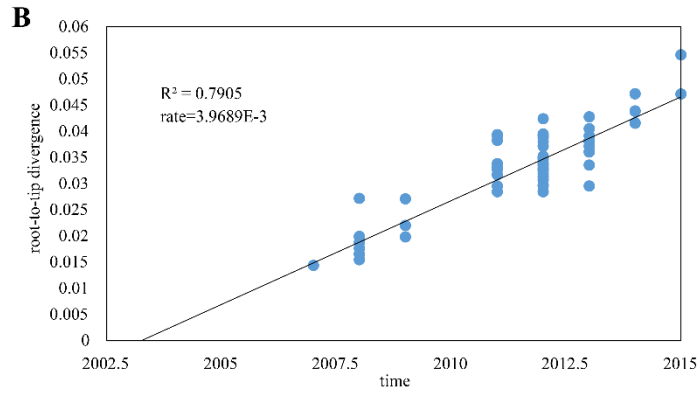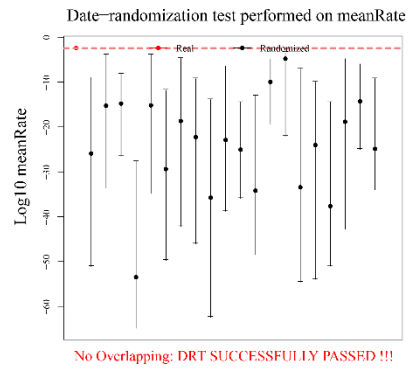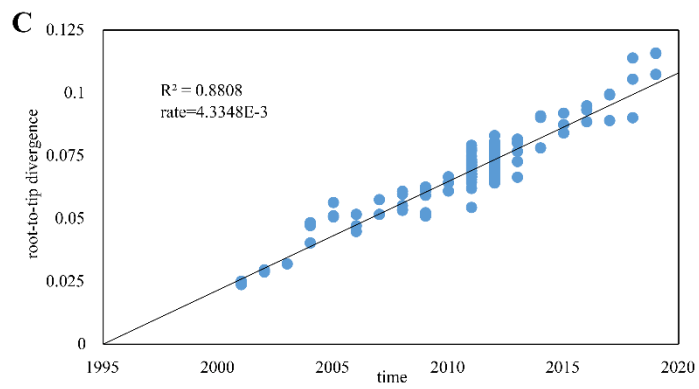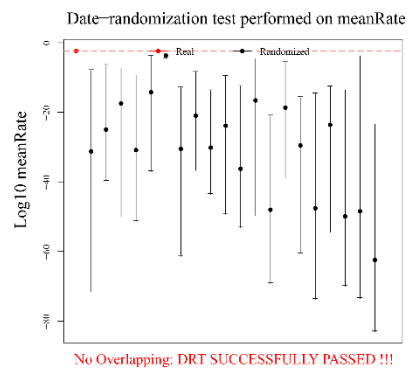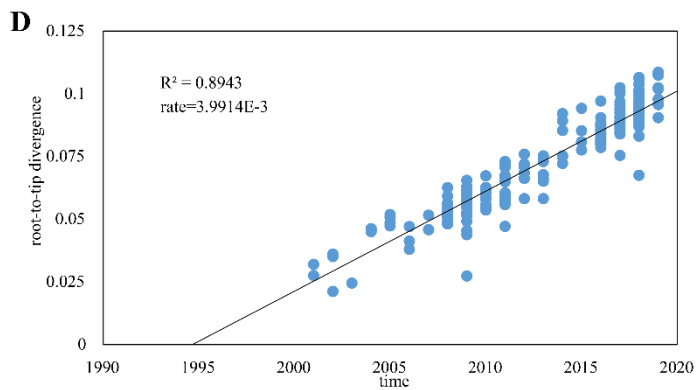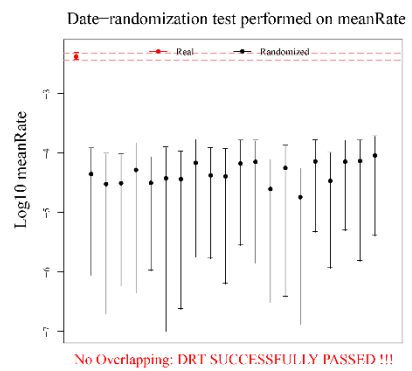

**Fig. S4**

**The maximum likelihood tree of 259 representative sequences based on the ORF region.** The maximum likelihood tree was constructed based on the ORF of 259 EV-A71 representative sequences. The sequences of the same clade are represented by triangles, and their size is proportional to the number of sequences in each clade. A) The *VPI* region of the sequences belonging to the same genotype/subgenotype filled with the same color. B) The  $3D^{pol}$  region of the sequences belonging to the same lineage filled with the same color.

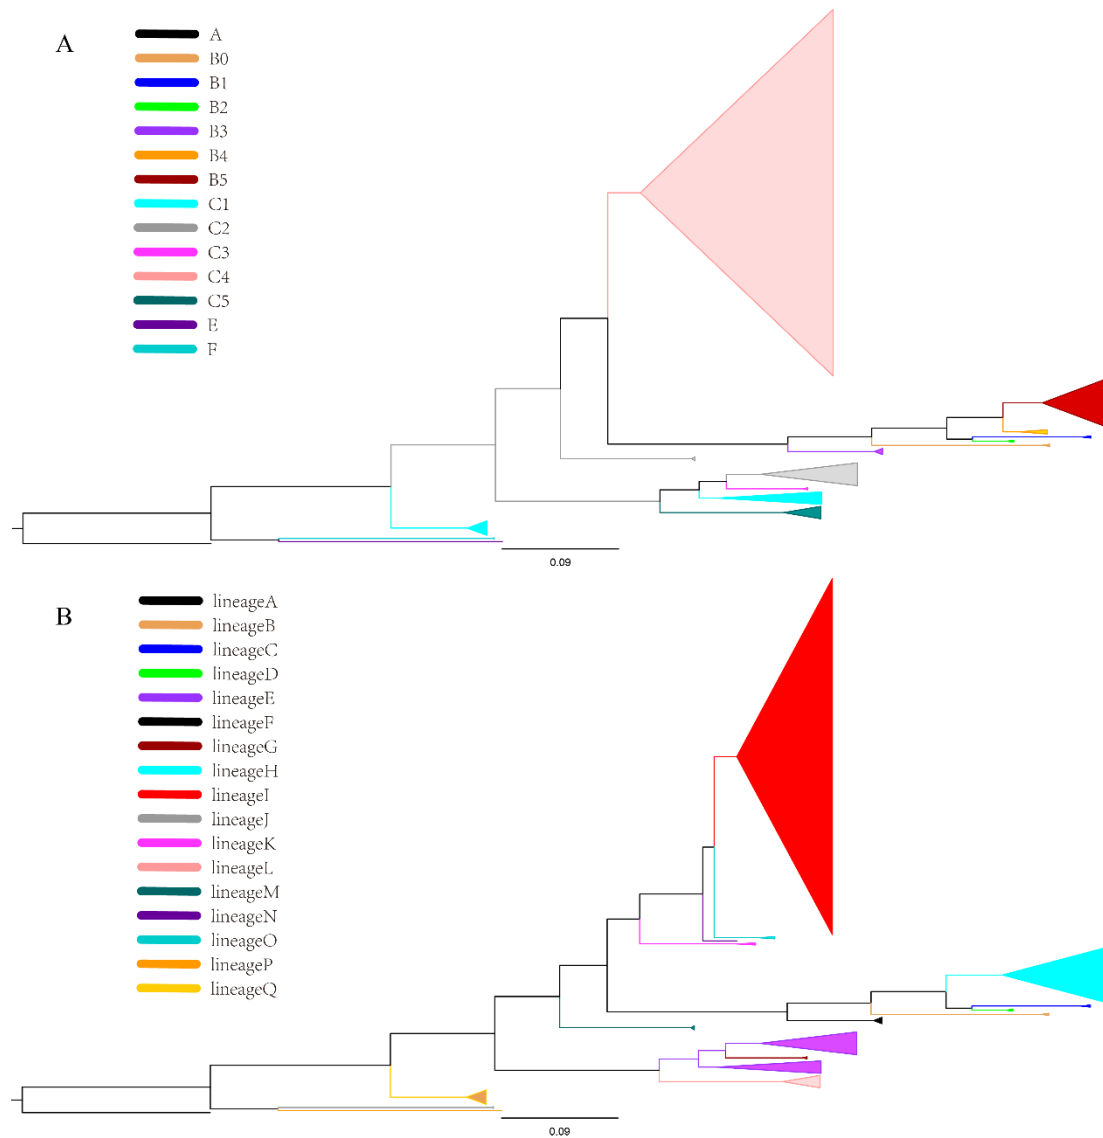

**Fig. S5**

**Schematic diagram of sequence analysis.** Schematic diagram of the sequence analysis and the corresponding datasets, different analysis modules with different colors.

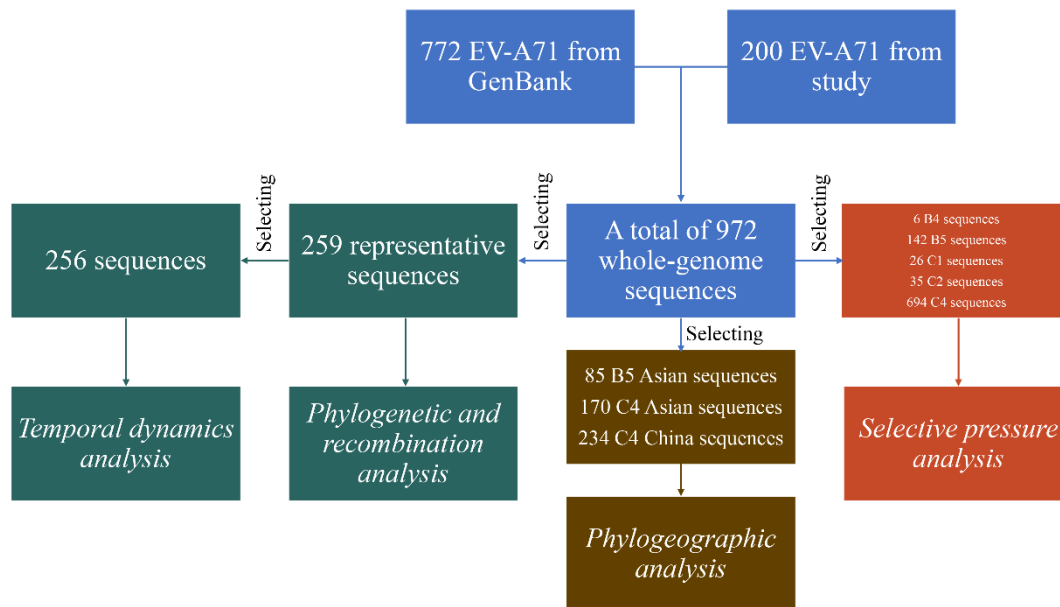

## References

1. Yang CF, Naguib T, Yang SJ, Nasr E, Jorba J, Ahmed N, Campagnoli R, van der Avoort H, Shimizu H, Yoneyama T, Miyamura T, Pallansch M, Kew O. 2003. Circulation of endemic type 2 vaccine-derived poliovirus in Egypt from 1983 to 1993. *J Virol* 77:8366-77.
2. Duchêne S, Duchêne D, Holmes EC, Ho SY. 2015. The Performance of the Date-Randomization Test in Phylogenetic Analyses of Time-Structured Virus Data. *Mol Biol Evol* 32:1895-906.
3. Gao F, Liu X, Du Z, Hou H, Wang X, Wang F, Yang J. 2019. Bayesian phylodynamic analysis reveals the dispersal patterns of tobacco mosaic virus in China. *Virology* 528:110-117.
